1 Research Article

2 **Title: Suppression of endothelial miR-22-3p mediates non-small cell lung**  
3 **cancer cell-induced angiogenesis**

4  
5 **Authors:** Yuan Gu<sup>1\*</sup>, Gianni Pais<sup>1</sup>, Vivien Becker<sup>1</sup>, Christina Körbel<sup>1</sup>, Emmanuel Ampofo<sup>1</sup>,  
6 Elke Ebert<sup>2</sup>, Johannes Hohneck<sup>2</sup>, Nicole Ludwig<sup>3</sup>, Eckart Meese<sup>3</sup>, Rainer M. Bohle<sup>2</sup>, Yingjun  
7 Zhao<sup>4</sup>, Michael D. Menger<sup>1</sup>, Matthias W. Laschke<sup>1</sup>

8  
9 **Affiliations:**

10 <sup>1</sup>Institute for Clinical & Experimental Surgery, Saarland University, 66421 Homburg/Saar,  
11 Germany

12 <sup>2</sup>Institute of Pathology, Medical Center, Saarland University, 66421 Homburg/Saar, Germany

13 <sup>3</sup>Institute of Human Genetics, Medical School, Saarland University, 66421 Homburg/Saar,  
14 Germany

15 <sup>4</sup>Fudan University Shanghai Cancer Center and Institutes of Biomedical Sciences, Department  
16 of Oncology, Shanghai Medical College, Fudan University, Shanghai 200032, China

17  
18 \*Corresponding author:

19 Yuan Gu, Ph.D.

20 Institute for Clinical & Experimental Surgery, Saarland University, 66421 Homburg/Saar,  
21 Germany

22 phone: +49 6841 162 6368

23 fax: +49 6841 162 6553

24 e-mail: yuan.gu@uks.eu

25

26 **Abstract**

27 MicroRNAs (miRNAs) expressed in endothelial cells (ECs) are powerful regulators of  
28 angiogenesis, which is essential for tumor growth and metastasis. Here, we demonstrated that  
29 miR-22-3p (miR-22) is preferentially and highly expressed in ECs, while its endothelial level  
30 is significantly down-regulated in human non-small cell lung cancer (NSCLC) tissues when  
31 compared to matched non-tumor lung tissues. This reduction of endothelial miR-22 is induced  
32 by NSCLC cell-secreted tumor necrosis factor (TNF)- $\alpha$  and interleukin (IL)-1 $\beta$ . Endothelial  
33 miR-22 functions as a potent angiogenesis inhibitor that inhibits all the key angiogenic  
34 activities of ECs and consequently NSCLC growth through directly targeting sirtuin (*SIRT*) 1  
35 and fibroblast growth factor receptor (*FGFR*) 1 in ECs, leading to inactivation of  
36 AKT/mammalian target of rapamycin (mTOR) signaling. These novel findings provide  
37 insight into the molecular mechanisms of NSCLC angiogenesis and indicate that endothelial  
38 miR-22 represents a potential target for the future anti-angiogenic treatment of NSCLC.

39

40

41

42

43

44

45

46 **Key words:** angiogenesis, endothelial cells, FGFR1, IL-1 $\beta$ , miR-22, NSCLC, SIRT1, TNF- $\alpha$

47

## 48 **Introduction**

49 Angiogenesis, i.e. the formation of new blood vessels from pre-existing ones, is essential for  
50 tumor growth and metastasis. Accordingly, excessive angiogenesis is a poor prognostic  
51 indicator for the aggressiveness of different cancer types, such as non-small cell lung cancer  
52 (NSCLC) (1). Tumor angiogenesis is tightly regulated by the balance between pro- and anti-  
53 angiogenic factors, which involves the dynamic communication between tumor cells and  
54 endothelial cells (ECs). Tumor cells are capable of releasing different pro-angiogenic factors,  
55 such as vascular endothelial growth factor (VEGF), basic fibroblast growth factor (bFGF,  
56 FGF2), epidermal growth factor (EGF), tumor necrosis factor (TNF)- $\alpha$ , interleukin (IL)-1 $\beta$ ,  
57 IL-6 and IL-8 (2, 3). The binding of these factors to their receptors located on ECs activates  
58 pivotal downstream angiogenesis-related signaling pathways, such as phosphoinositide 3  
59 kinase (PI3K)/AKT/mammalian target of rapamycin (mTOR) signaling (4). Consequently,  
60 ECs are stimulated to degrade their basement membrane, proliferate, migrate toward tumor  
61 cells and interconnect with each other to form new microvascular networks (2, 4).

62 Previous studies have shown that sirtuin (SIRT) 1 plays a crucial role in the regulation  
63 of angiogenesis (5). SIRT1 is a prototype member of the sirtuin family of nicotinamide  
64 adenine dinucleotide-dependent class III histone deacetylases. Loss of SIRT1 results in a  
65 significant reduction of EC sprouting and branching activity (5). Moreover, endothelial SIRT1  
66 deletion impairs angiogenesis within ischemic hindlimbs and the kidney (5, 6). The pro-  
67 angiogenic effect of SIRT1 is most probably mediated by some of its substrates. In fact, it has  
68 been reported that SIRT1 deacetylates AKT, which binds to phosphatidylinositol (3,4,5)-  
69 triphosphate, leading to the activation of the AKT/mTOR pathway (7). In addition, SIRT1  
70 deacetylates the forkhead transcription factor FOXO1 and, thus, suppresses its anti-  
71 angiogenic activity (5). Besides, SIRT1 can also promote the phosphorylation of AKT by up-  
72 regulating the transcription of Rictor, a component of mechanistic target of rapamycin

73 complex 2 (mTORC2) (8).

74 MicroRNAs (miRNAs) are short (~22 nucleotides), endogenous, non-coding RNAs that  
75 modulate gene expression primarily through binding to the 3'-untranslated region (UTR) of  
76 messenger RNA (mRNA), leading to mRNA degradation or translation inhibition (9). In the  
77 last decade, accumulating evidence has suggested miRNAs as powerful regulators of  
78 angiogenesis. Furthermore, miRNA deregulation has been linked to tumor development and  
79 progression. Of interest, alterations of miR-22-3p (miR-22) expression within different human  
80 body fluids and tumor tissues are considered to be of great significance for the diagnosis,  
81 surveillance and prognosis of multiple types of cancer, such as NSCLC (10). MiR-22, which  
82 is located on chromosome 17p13 and highly conserved among metazoans (11), has been  
83 reported to be also expressed in different types of ECs (12). However, its role in regulating  
84 tumor angiogenesis remains elusive.

85 In the present study, we analyzed the regulation of endothelial miR-22 by NSCLC cells.  
86 We then systematically investigated the function of miR-22 in basic angiogenic processes,  
87 including EC proliferation, migration and tube formation. The observed anti-angiogenic  
88 action of miR-22 was further confirmed in an *ex vivo* mouse aortic ring assay and an *in vivo*  
89 Matrigel plug assay. In addition, we studied the effects of endothelial miR-22 on tumor  
90 angiogenesis and growth in a mouse flank tumor model. Finally, mechanistic analyses  
91 identified *SIRT1* and *FGFR1* as functional targets of miR-22 in ECs.

92

## 93 **Results**

### 94 **Endothelial miR-22 is down-regulated in human NSCLC tissues**

95 In a first step, ECs lining the blood vessels in tumor tissues and matched adjacent non-tumor  
96 lung tissues from 12 patients with lung adenocarcinoma were retrieved by means of laser  
97 capture microdissection (LCM). By a small-scale screening using real-time PCR we identified

98 miR-22 to be significantly down-regulated in ECs isolated from tumor tissues when compared  
99 to those isolated from matched non-tumor lung tissues (Figure 1A).

100 Of note, miR-22 was found to be preferentially and highly expressed in both types of  
101 analyzed ECs, i.e. human dermal microvascular endothelial cells (HDMECs) and human  
102 umbilical vein endothelial cells (HUVECs), when compared to NSCLC cells (NCI-H460 and  
103 NCI-H23) and other cell types in the tumor microenvironment, such as pericytes (human  
104 pericytes from placenta (hPC-PLs)) and fibroblasts (normal human dermal fibroblasts  
105 (NHDFs)). This indicates a specific and important regulatory function of miR-22 in ECs  
106 (Figure1B).

107

#### 108 **NSCLC cells down-regulate miR-22 expression in ECs**

109 Since tumor cells are capable of stimulating the angiogenic activity of ECs by both direct cell-  
110 cell contact and paracrine signaling, we next utilized a contact co-culture system to  
111 investigate how the expression of miR-22 in HDMECs is regulated by NSCLC cells. After 24  
112 h of either culturing HDMECs alone or co-culturing them with NCI-H460 or NCI-H23 cells,  
113 HDMECs were isolated using CD31 magnetic beads. The purity of isolated HDMECs was  
114 approximately 99% and 90% in the HDMECs mono-culture and co-culture group,  
115 respectively, as assessed by flow cytometry. Real-time PCR assays revealed a 25% and a 18%  
116 reduction of miR-22 expression in HDMECs co-cultured with NCI-H460 cells and NCI-H23  
117 cells, when compared to HDMEC mono-culture (Figure 1C). In an additional set of  
118 experiments, we co-cultured HDMECs with NSCLC cells, however, without contact between  
119 these two cell types in a transwell plate. Interestingly, this non-contact co-culture with NCI-  
120 H460 cells caused a 35% decrease in the miR-22 expression level of HDMECs (Figure 1D),  
121 indicating that soluble factors secreted by the tumor cells contribute to the down-regulation of  
122 endothelial miR-22. This finding was confirmed by the co-culture of HDMECs with NCI-H23

123 cells, which also significantly reduced the endothelial expression of miR-22 by 31% (Figure  
124 1D).

125 In order to identify individual factors mediating the NSCLC cell-induced reduction of  
126 endothelial miR-22, HDMECs were stimulated with the growth factors VEGF, bFGF and  
127 EGF as well as the pro-inflammatory cytokines TNF- $\alpha$ , IL-1 $\beta$  and IL-6. Real-time PCR  
128 analyses revealed that the expression of miR-22 is significantly suppressed by TNF- $\alpha$  and IL-  
129 1 $\beta$ , but not affected by VEGF, bFGF, EGF and IL-6 stimulation (Figure 1E). Given the fact  
130 that both TNF- $\alpha$  and IL-1 $\beta$  are upstream inducers of nuclear factor (NF)- $\kappa$ B, which promotes  
131 or represses the transcription of a broad spectrum of genes and miRNAs (13, 14), we then  
132 investigated whether NF- $\kappa$ B inhibits the transcription of miR-22 in ECs. For this purpose,  
133 HDMECs were exposed to the NF- $\kappa$ B inhibitor Bay 11-7082 (Bay) for 24 h. This resulted in a  
134 2-fold increase of miR-22 expression when compared to vehicle-treated controls (Figure 1F),  
135 indicating that this miRNA is transcriptionally repressed by NF- $\kappa$ B.

136 To investigate whether NF- $\kappa$ B mediates the down-regulation of endothelial miR-22  
137 induced by NSCLC cells, we assessed the activation status of NF- $\kappa$ B in HDMECs cultured  
138 alone or co-cultured with NCI-H460 cells without contact. By means of immunofluorescence,  
139 we demonstrated that the nuclear translocation of p65, a main subunit of NF- $\kappa$ B, is  
140 significantly enhanced in HDMECs co-cultured with tumor cells (Figure 1G and H).  
141 Importantly, blockade of NF- $\kappa$ B signaling with Bay completely reversed the reduction of  
142 endothelial miR-22 induced by non-contact co-culture with NCI-H460 cells (Figure 1I).

143

#### 144 **MiR-22 inhibits the angiogenic activity of ECs**

145 To study the function of miR-22 in regulating EC angiogenic activity, we transfected  
146 HDMECs with miR-22 mimic (miR-22m) and miR-22 inhibitor (miR-22i) to up- and down-  
147 regulate the intracellular level of this miRNA, respectively. Cells transfected with negative

148 control of mimic (NCm) or negative control of inhibitor (NCi) served as controls. The  
149 transfection efficiencies of miR-22m (5 nM) and miR-22i (100 nM) were evaluated by real-  
150 time PCR assays, as shown in Figure 2-figure supplement 1A and B.

151 At first, water-soluble tetrazolium (WST)-1 assays were performed to assess the  
152 viability of ECs. Transfection with miR-22m significantly reduced the viability of HDMECs  
153 after 48 h of incubation (Figure 2A). This inhibitory effect of miR-22m was detectable for at  
154 least 10 days (Figure 2-figure supplement 1C). In contrast, an increased viability rate was  
155 observed in miR-22i-transfected ECs (Figure 2B). The effect of miR-22 on EC proliferation  
156 was further analyzed by flow cytometry assessing the cell cycle distribution of transfected  
157 HDMECs. The S-phase cell population was significantly increased in miR-22m-transfected  
158 HDMECs when compared to NCm-transfected controls (Figure 2-figure supplement 2A and  
159 B). This was associated with an increase in the number of sub-G1-phase cells (Figure 2-figure  
160 supplement 2A and C). These results suggest that miR-22 inhibits EC proliferation and  
161 induces apoptosis by blocking the cells in the S phase.

162 To investigate the function of miR-22 in regulating EC motility, scratch wound healing  
163 assays and transwell migration assays were performed. Transfection of HDMECs with miR-  
164 22m markedly delayed the healing of scratched wounds (Figure 2C and E) and reduced the  
165 number of transwell migrated cells by 34% (Figure 2-figure supplement 3A and B). In  
166 contrast, transfection of HDMECs with miR-22i significantly promoted wound closure  
167 (Figure 2D and F) and enhanced cell migration by 42% (Figure 2-figure supplement 3C and  
168 D).

169 In addition, we performed a tube formation assay to investigate the function of miR-22  
170 in regulating the tube forming activity of HDMECs. Transfection with miR-22m markedly  
171 reduced the number of newly developed tube meshes by 76% when compared to NCm-

172 transfected controls (Figure 2G and H). In contrast, miR-22i significantly augmented EC tube  
173 formation by 64% (Figure 2I and J).

174

### 175 **Endothelial miR-22 suppresses angiogenesis *ex vivo* and *in vivo***

176 To elucidate whether miR-22 is involved in endothelial sprouting, we performed an *ex vivo*  
177 mouse aortic ring assay. We found that the area of vascular sprouting from aortic rings is  
178 significantly decreased by transfection with miR-22m (Figure 3A and B) and significantly  
179 increased by transfection with miR-22i (Figure 3C and D).

180 To confirm our *in vitro* findings, we performed an *in vivo* Matrigel plug assay. Matrigel  
181 plugs containing miR-22m-transfected HDMECs exhibited a 58% reduction of the  
182 microvessel density 7 days after implantation when compared to those containing NCm-  
183 transfected controls (Figure 3E and F). In contrast, plugs containing miR-22i-transfected cells  
184 presented with a 42% higher microvessel density than plugs containing NCI-transfected cells  
185 (Figure 3G and H).

186

### 187 **Endothelial miR-22 inhibits tumor angiogenesis and growth**

188 The findings above demonstrated that: i) NSCLC cells down-regulate the expression level of  
189 miR-22 in ECs and ii) miR-22 acts as a potent angiogenesis inhibitor. Hence, we assumed that  
190 tumor cells stimulate angiogenesis at least partially through suppressing endothelial miR-22  
191 expression. To verify this hypothesis, we established an *in vivo* tumor cell-EC communication  
192 model by injecting NCI-H460 cells together with NCm- or miR-22m-transfected HDMECs  
193 into the flanks of NOD-SCID mice. Digital caliper measurements and high-resolution  
194 ultrasound imaging were performed to assess the volume of the newly developing tumors. We  
195 found that transfection of HDMECs with miR-22m significantly inhibits NCI-H460 tumor  
196 development between day 7 to 14 when compared to NCm-transfected controls (Figure 4A, C



197 and D). Accordingly, tumors containing miR-22m-transfected HDMECs also exhibited a  
198 markedly reduced final tumor weight (Figure 4B). As expected, overexpression of miR-22 in  
199 HDMECs significantly counteracted the tumor cell-stimulated development of human  
200 microvessels within the tumors, but not the angiogenic ingrowth of mouse microvessels from  
201 the surrounding host tissue (Figure 4E and F). Additional immunohistochemical analyses  
202 demonstrated that tumors containing miR-22m-transfected HDMECs exhibited less Ki67-  
203 positive but more cleaved caspase (casp)-3-positive tumor cells when compared to controls  
204 (Figure 4G-J). This indicates that miR-22 overexpression in tumor ECs inhibits the  
205 proliferation of tumor cells and also promotes their apoptotic cell death.

206

#### 207 **MiR-22 targets *SIRT1* and *FGFR1* in ECs**

208 To identify the functional targets of miR-22 that mediate its anti-angiogenic effects in ECs,  
209 we first analyzed the predicted human target genes of miR-22 according to the algorithms of  
210 miRDB and TargetScan. We detected 5 genes that are involved in angiogenesis and have not  
211 been validated as miR-22 targets, which encode tumor necrosis factor receptor (TNFR) 2,  
212 vascular endothelial zinc finger (VEZF) 1, transforming growth factor beta-activated kinase  
213 (TAK) 1, serine-arginine protein kinase (SRPK) 1 and protein kinase C beta (PRKCB).  
214 However, none of these genes was down-regulated in miR-22m-transfected HDMECs when  
215 compared to NCm-transfected controls (Figure 5A).

216 Moreover, we analyzed the validated human targets of this miRNA based on the current  
217 literature and found 13 angiogenesis-related genes. These genes encode brain-derived  
218 neurotrophic factor (BDNF), cysteine-rich protein (CYR) 61, cluster of differentiation (CD)  
219 151, lysine-specific demethylase (KDM) 3A, specificity protein (SP) 1, neuroepithelial cell  
220 transforming (NET) 1, CD147, high mobility group box protein (HMGB) 1, DNA damage  
221 inducible transcript (DDIT) 4, neuroblastoma RAS viral oncogene homolog (NRAS),

222 metadherin (MTDH), SIRT1 and FGFR1. By performing real-time PCR assays, the mRNA  
223 levels of *SIRT1* and *FGFR1* were found to be significantly decreased in miR-22m-transfected  
224 HDMECs when compared to NCM-transfected controls (Figure 5A). Consistently, the protein  
225 levels of *SIRT1* and *FGFR1* were markedly decreased by miR-22 overexpression, as assessed  
226 by Western blot (Figure 5B and C). Recently, Hu et al. reported that miR-22 targets *FGFR1* in  
227 human liver Huh7 cells (15). We further confirmed this finding in 293T cells, which is a  
228 highly transfectable cell line and widely used for miRNA target validation. For this purpose, a  
229 dual luciferase assay was performed by co-transfecting miR-22m and *FGFR1*-3'UTR  
230 luciferase reporter plasmid (wild-type) or an empty plasmid with deletion of *FGFR1*-3'UTR  
231 (mutant) into the cells. We found that miR-22m significantly attenuates the activity of  
232 *FGFR1*-3'UTR luciferase reporter, whereas no reduction was detected upon co-transfection  
233 with mutant plasmid (Figure 5D).

234         Given the fact that both SIRT1 and FGFR1 are upstream proteins of the pivotal  
235 angiogenesis regulatory pathway AKT/mTOR, we performed Western blot analyses to assess  
236 the activation of this pathway in NCM- and miR-22m-transfected HDMECs. As expected,  
237 transfection with miR-22m markedly reduced the phosphorylation of AKT and mTOR by  
238 52% and 48%, respectively (Figure 5E-G).

239

#### 240 **MiR-22 inhibits angiogenesis through targeting *SIRT1* and *FGFR1***

241 Previous studies suggest an important role of SIRT1 and FGFR1 in regulating angiogenesis  
242 (5, 16). To determine whether miR-22 inhibits the angiogenic activity of ECs through  
243 targeting *SIRT1* and *FGFR1*, the specific SIRT1 inhibitor EX-527 (EX) and the selective  
244 FGFR1 inhibitor PD173074 (PD) were used in an additional panel of *in vitro* assays. By  
245 means of a WST-1 assay, we found that 10-50  $\mu$ M EX and 50-500 nM PD significantly  
246 reduce the viability of HDMECs after 3 days of treatment (Figure 6A and B). Accordingly, to

247 avoid cytotoxic effects of these compounds, we chose a minimal effective dose of each  
248 inhibitor, i.e. 10  $\mu$ M EX and 50 nM PD, for the following WST-1, scratch wound healing and  
249 tube formation assays. These functional analyses revealed that exposure to EX and PD  
250 completely reverses miR-22i-promoted HDMEC viability, migration and tube formation  
251 (Figure 6C-E).

252 Furthermore, we analyzed whether miR-22 functions through suppressing AKT/mTOR  
253 signaling, which is a common down-stream pathway of SIRT1 and FGFR1, using the highly  
254 specific AKT inhibitor MK-2206 (MK). In a previous publication (17), we found that 5-40  
255  $\mu$ M MK-2206 significantly reduces HDMEC viability after 3 days of incubation.  
256 Accordingly, miR-22i-transfected HDMECs were exposed to 5  $\mu$ M MK-2206 followed by  
257 WST-1, scratch wound healing and tube formation assays. By this, we could demonstrate that  
258 inhibition of AKT completely counteracts miR-22i-enhanced HDMEC viability, migration  
259 and tube formation (Figure 6F-H).

260 Because we found that NSCLC cells down-regulate endothelial miR-22 by activating  
261 NF- $\kappa$ B possibly via secreting TNF- $\alpha$  and IL-1 $\beta$ , we investigated the regulation of the miR-22  
262 targeted genes in ECs. For this purpose, we assessed the expression of *SIRT1* and *FGFR1* in  
263 TNF- $\alpha$ -, IL-1 $\beta$ - or Bay-exposed HDMECs as well as HDMECs co-cultured with NCI-H460  
264 cells. Real-time PCR assays revealed that TNF- $\alpha$  significantly increases the mRNA levels of  
265 *SIRT1* and *FGFR1* and IL-1 $\beta$  promotes the expression of *SIRT1* but not of *FGFR1* (Figs. 6I  
266 and J). In contrast, Bay reduced the expression of the two genes (Figure 6I and J). Moreover,  
267 non-contact co-culture of HDMEC with NCI-H460 cells significantly up-regulated the  
268 endothelial expression of *SIRT1* and *FGFR1*, whereas inhibition of NF- $\kappa$ B with Bay reversed  
269 this up-regulation (Figure 6K and L).

270

## 271 Discussion

272 MiR-22 is widely studied in tumorigenesis, where it acts as a tumor suppressor or an  
273 oncogene by regulating the proliferation, migration, invasion, metastasis, apoptosis,  
274 senescence and epithelial-mesenchymal transition of different types of tumor cells (11).  
275 Moreover, the aberrant expression of miR-22 in tumor tissues and body fluids of cancer  
276 patients provides the possibility to use this miRNA as an independent diagnostic and  
277 prognostic biomarker (10). Besides, it is known that miR-22 induces endothelial progenitor  
278 cell senescence and its injection into zebrafish embryos causes defective vascular  
279 development (18, 19). However, the regulation, function and targets of miR-22 in ECs still  
280 need to be clarified. Our novel findings now demonstrate that miR-22 is preferentially and  
281 highly expressed in ECs and the suppression of endothelial miR-22 mediates NSCLC cell-  
282 promoted blood vessel formation. In fact, NSCLC cell-released TNF- $\alpha$  and IL-1 $\beta$  activate  
283 endothelial NF- $\kappa$ B and, thus, markedly reduce the high expression of miR-22 in ECs. This  
284 increases the angiogenic activity of ECs, because miR-22 functions as a potent angiogenesis  
285 inhibitor by targeting *SIRT1* and *FGFR1*.

286 Lung cancer is the most frequently diagnosed cancer and the leading cause of cancer  
287 death in both sexes worldwide (20). Non-small cell lung cancer (NSCLC), including  
288 adenocarcinoma, large cell carcinoma and squamous cell carcinoma, accounts for  
289 approximately 85% of all lung cancer cases. Despite recent advances in diagnosis and  
290 treatment, many patients with NSCLC still have limited treatment options and a poor  
291 prognosis (21). Therefore, we focused in the present study on this specific tumor type and  
292 identified miR-22 to be significantly down-regulated in ECs dissected from human NSCLC  
293 tissues when compared to that from matched non-tumor lung tissues. *In vitro*, we also  
294 detected a significantly down-regulated expression of miR-22 in HDMECs directly co-  
295 cultured with NCI-H460 or NCI-H23 cells when compared to EC mono-cultures. This is in  
296 line with a previous study reporting that miR-22 expression in primary human brain

297 microvascular ECs is reduced by contact co-culture with U87 glioma cells (22). Hence,  
298 endothelial miR-22 seems to be regulated by different types of tumors.

299 Tumor cells can directly interact with ECs via adhesion receptors and gap junctions. In  
300 addition, they can activate ECs by secreting soluble factors and microvesicles into the  
301 extracellular space as well as by changing the pH, oxygen and nutrient levels in the  
302 surrounding microenvironment (23). Therefore, we next assessed the endothelial expression  
303 of miR-22 in a non-contact co-culture system, in which HDMECs and NCI-H460 or NCI-H23  
304 cells were separated from each other in a transwell plate. In this setting, the expression of  
305 miR-22 was also significantly reduced in co-cultured HDMECs, indicating that the change in  
306 endothelial miR-22 expression is at least partially due to an indirect interaction between  
307 NSCLC cells and ECs.

308 To identify the factors, which mediate the communication between tumor cells and ECs,  
309 we stimulated HDMECs with several soluble factors that can be secreted by NCLSC cells and  
310 are crucially involved in angiogenesis. Our results showed that TNF- $\alpha$  and IL-1 $\beta$ , but not  
311 VEGF, bFGF, EGF and IL-6, markedly reduce the endothelial expression of miR-22. Of note,  
312 TNF- $\alpha$  is a major pro-inflammatory cytokine, which exerts contradictory effects on blood  
313 vessel formation. High doses of exogenous TNF- $\alpha$  have been shown to inhibit angiogenesis,  
314 whereas low doses or endogenous TNF- $\alpha$  stimulate the angiogenic process and stabilize the  
315 newly developing microvascular networks within tumors (24, 25). Moreover, Sainson et al.  
316 reported that pulsed administration of high doses of TNF- $\alpha$  stimulates angiogenesis by  
317 inducing a tip cell phenotype (26). In contrast, the pro-inflammatory cytokine IL-1 $\beta$  is widely  
318 accepted as a pro-angiogenic factor (27). TNF- $\alpha$  and IL-1 $\beta$  exert their biological functions  
319 through binding to TNF receptor and IL-1 receptor, respectively. This, in turn, recruits and  
320 activates the inhibitor of NF- $\kappa$ B (I $\kappa$ B) kinase complex. The consequent phosphorylation of  
321 I $\kappa$ B proteins leads to the translocation of NF- $\kappa$ B into the nucleus, where it promotes or

322 represses the transcription of mRNAs and miRNAs (13, 14). Of interest, a recent study  
323 identified two NF- $\kappa$ B binding motifs in the miR-22 promoter that mediate the transcriptional  
324 repression of miR-22 in 182<sup>R</sup>-6 breast cancer cells (28). Our results now demonstrate that the  
325 exposure of HDMECs to the NF- $\kappa$ B inhibitor Bay 11-7082 significantly increases miR-22  
326 expression, indicating that miR-22 is not only transcriptionally repressed by NF- $\kappa$ B in tumor  
327 cells but also in ECs. More importantly, we verified that NSCLC cell-induced NF- $\kappa$ B  
328 activation by secreting TNF- $\alpha$  and IL-1 $\beta$  contributes to the down-regulation of miR-22 in  
329 HDMECs co-cultured with NCI-H460 cells.

330 We next investigated the effects of endothelial miR-22 on angiogenesis. By a panel of  
331 well-established *in vitro* angiogenesis assays, we could demonstrate that miR-22 is a  
332 pleiotropic angiogenesis inhibitor that targets all the major steps of the angiogenic process,  
333 including EC proliferation, migration and tube formation. Of note, the inhibitory effects of  
334 miR-22 on these steps were not directly dependent on each other. This is indicated by the  
335 observation that miR-22m inhibits HDMEC migration and tube formation within 24 h after  
336 transfection without affecting the viability of the cells. Our *in vitro* results were further  
337 confirmed by an *ex vivo* mouse aortic ring assay and an *in vivo* Matrigel plug assay. The fact  
338 that the mouse aortic ring assay is based on the angiogenic sprouting activity of murine ECs  
339 shows that the anti-angiogenic effect of miR-22 is reproducible in ECs of different origin.

340 The findings above suggest that NSCLC cells stimulate angiogenesis by down-  
341 regulating endothelial miR-22 expression to support their growth. To verify this conclusion,  
342 we established an *in vivo* tumor cell-EC communication model. In this model, NCI-H460 cells  
343 admixed with NCM- or miR-22-transfected HDMECs were injected into the flanks of  
344 immunodeficient mice. By this, we could demonstrate that overexpression of miR-22 in  
345 HDMECs significantly suppresses their assembly into new microvessels within the tumors,  
346 resulting in a reduced tumor growth. Noteworthy, this modified flank tumor model only

347 allows the manipulation of miR-22 expression in exogenous human ECs but not endogenous  
348 mouse ECs. However, these mouse ECs invade the developing tumor, assemble into new  
349 microvessels and, thus, also support tumor growth. Accordingly, our model may  
350 underestimate the inhibitory effect of miR-22 on NSCLC growth. So far, targeted delivery of  
351 miRNA into vascular ECs *in vivo* is still a big challenge (29). This largely prevents basic  
352 studies to translate into novel clinical applications. Hence, it will be necessary to develop  
353 miRNA modifications and sophisticated delivery systems to improve the safety, efficiency  
354 and specificity of miRNA-based therapeutics. Rapid progress in chemical and bioengineering  
355 of miRNA, nanotechnology and viral vector development may markedly contribute to achieve  
356 this in the future.

357 MiRNAs have the potential to regulate multiple target genes and related manifold  
358 signaling pathways. Moreover, each miRNA may function differently in diverse cell types  
359 due to the high complexity of cellular physiology (30). Therefore, it was necessary in the  
360 present study to identify the specific functional targets of miR-22 in ECs. For this purpose, we  
361 analyzed the putative and validated human target genes of miR-22 and identified *SIRT1* and  
362 *FGFR1* to be down-regulated in miR-22-overexpressing HDMECs. FGFR1, a member of  
363 FGFR family of receptor tyrosine kinases, is most commonly expressed on ECs (16).  
364 Activation of FGFR1 by heparin-binding FGFs, mainly FGF1 and bFGF, increases the  
365 angiogenic activity of ECs *in vitro* and *in vivo* (16). Thus, FGFR1 has been increasingly  
366 considered to be an attractive target for the anti-angiogenic treatment of tumors. In order to  
367 investigate whether the suppression of *SIRT1* or *FGFR1* mediates the anti-angiogenic function  
368 of miR-22, we exposed miR-22i-transfected HDMECs to the SIRT1 inhibitor EX-527 or the  
369 FGFR1 inhibitor PD173074. These small molecular inhibitors were used instead of short  
370 interfering RNAs (siRNAs) against SIRT1 or FGFR1, because we found in preliminary  
371 experiments that the co-transfection efficiency of miR-22i and siRNAs is quite low in

372 HDMECs. Our results showed that both EX-527 and PD173074 completely reverse miR-22i-  
373 induced HDMEC proliferation, migration and tube formation. Hence, *SIRT1* and *FGFR1* are  
374 functional targets of miR-22 in the regulation of angiogenesis. Moreover, we found that the  
375 endothelial expression of *SIRT1* and *FGFR1* is up-regulated by NSCLC cell-activated NF- $\kappa$ B  
376 signaling possibly via secretion of TNF- $\alpha$  and IL-1 $\beta$ .

377 In conclusion, this study demonstrates that down-regulation of endothelial miR-22  
378 significantly contributes to NSCLC cell-stimulated angiogenesis. As summarized in Figure 7,  
379 tumor cell-released TNF- $\alpha$  and IL-1 $\beta$  bind to their receptors located on ECs, causing the  
380 intracellular activation of NF- $\kappa$ B. This, in turn, suppresses endothelial miR-22 expression.  
381 MiR-22 targets the two pivotal pro-angiogenic regulators *SIRT1* and *FGFR1*, which results in  
382 the blockage of AKT/mTOR signaling and inhibition of angiogenesis. Thus, the NF- $\kappa$ B-  
383 induced suppression of miR-22 results in an increased SIRT1- and FGFR1-mediated  
384 angiogenesis. Taken together, this novel mechanism indicates that endothelial miR-22 may  
385 represent a promising therapeutic target for the treatment of NSCLC.

386

## 387 **Materials and Methods**

### 388 **Study design**

389 The main objective of our study was to analyze the function of endothelial miR-22 in  
390 regulating NSCLC angiogenesis. After identification of endothelial miR-22 to be significantly  
391 down-regulated in human NSCLC tissue from 12 patients, the following studies were  
392 designed: i) A contact and a non-contact coculture system were established *in vitro* using  
393 human ECs and NSCLC cells to study the regulation of endothelial miR-22 by NSCLC cells.  
394 ii) A panel of *in vitro* assays were exploited to investigate the effects of miR-22 on major  
395 angiogenic steps, including EC proliferation, migration and tube formation. Mimic and  
396 inhibitor of miR-22 were transfected into ECs to perform gain- and loss-of-function studies.



397 iii) A Matrigel plug assay and a mouse flank tumor model were performed to confirm the *in*  
398 *vivo* inhibitory effects of miR-22 on angiogenesis and tumor growth. iv) Real-time PCR,  
399 Western blot and luciferase assays were used to identify and verify the target genes of miR-  
400 22. In this study, the sample size was estimated based on previous publications and  
401 experience. For each *in vitro* assay, at least 3 independent experiments with at least 3  
402 biological replicates were performed to ensure the reproducibility and replicability of the  
403 results. Biological replicates are defined as separate cell cultures processed at the same time.  
404 Each mouse model included at least 5 mice in each group. These *in vivo* experiments could  
405 not be randomized, but all the analyses were performed by the investigators blinded to group  
406 assignment. All collected data were included in the analysis and no outliers were excluded.

407

#### 408 **Chemicals**

409 The NF- $\kappa$ B inhibitor Bay 11-7082, SIRT1 inhibitor EX-527 and FGFR1 inhibitor PD173074  
410 were purchased from Santa Cruz Biotechnology (Heidelberg, Germany). The AKT inhibitor  
411 MK-2206 2HCL (MK-2206) was purchased from SelleckChem (Munich, Germany).

412

#### 413 **Patient samples**

414 Human NSCLC tissues and matched adjacent non-tumor lung tissues were obtained from 12  
415 patients with lung adenocarcinoma. The pathological characteristics of these patients are  
416 shown in Supplementary file 1. All samples were dissected by professional pathologists in  
417 Saarland University Hospital, fixed in 4% formalin and embedded in paraffin. This study has  
418 been approved by the local ethics committee (permit number: 01/08) and the informed  
419 consent was provided by the patients.

420

#### 421 **LCM**

422 Sections with a thickness of 5  $\mu\text{m}$  of lung adenocarcinoma and matched adjacent non-tumor  
423 lung tissue were mounted on MembraneSlides (Leica Microsystems, Wetzlar, Germany) and  
424 stained with hematoxylin and eosin. By using a microdissection microscope (Leica AS LMD,  
425 Leica), ECs were dissected and catapulted into the cap of 0.5 mL tubes (Leica) after removal  
426 of blood cells from capillaries. Approximately 2,000 ECs were retrieved from each sample.  
427 This procedure was assisted by an experienced pathologist.

428

### 429 **Cell culture**

430 HDMECs (PromoCell, Heidelberg, Germany) were cultured in endothelial cell growth  
431 medium (EGM)-MV (PromoCell). HUVECs (PromoCell) were cultured in EGM  
432 (PromoCell). NHDFs (kind gift from Dr. Wolfgang Metzger, Department of Trauma, Hand  
433 and Reconstructive Surgery, Saarland University, Germany) were cultured in Dulbecco's  
434 modified Eagle's medium (DMEM; PAA, Cölbe, Germany) supplemented with 10% fetal calf  
435 serum (FCS), 100 U/mL penicillin and 0.1 mg/mL streptomycin (PAA). hPC-PLs  
436 (PromoCell) were cultured in pericyte growth medium (PromoCell). The human NSCLC cell  
437 lines NCI-H460 and NCI-H23 (ATCC, Wesel, Germany) were maintained in RPMI 1640  
438 medium supplemented with 10% FCS, 100 U/mL penicillin and 0.1 mg/mL streptomycin. All  
439 cells were incubated at 37 °C in a humidified atmosphere containing 5% CO<sub>2</sub>.

440

### 441 **Cell co-culture**

442 Contact and non-contact co-culture systems were used to assess the influence of tumor cells  
443 on endothelial miR-22 expression. For contact co-culture,  $1 \times 10^6$  HDMECs with or without  
444  $5 \times 10^6$  NCI-H460 or NCI-H23 cells were seeded into 100-mm dishes and cultured in FCS-free  
445 endothelial cell basal medium (EBM) for 24 h. HDMECs were then isolated using a human  
446 CD31 MicroBead kit (Miltenyi Biotec, Bergisch Gladbach, Germany) according to the

447 manufacturer's instructions. Briefly, the co-cultured cells were detached with accutase (PAA)  
448 and suspended in 100  $\mu$ L EBM. Subsequently, 30  $\mu$ L FcR blocking reagent and 30  $\mu$ L CD31  
449 MicroBeads were added, followed by incubation at 4 °C for 15 min. After adding 1 mL EBM,  
450 the cells were sequentially collected by centrifugation, resuspended in 1 mL EBM and applied  
451 onto the LS Columns in the magnetic field of a MidiMACS separator. The column was  
452 washed 10 times with 3 mL EBM and then removed from the separator. The retained  
453 endothelial cells were flushed out 3 times with 4 mL EBM by pushing the plunger into the  
454 column and collected for further purity assessment and RNA extraction. For non-contact co-  
455 culture, 6-well transwell plates containing inserts with 0.4  $\mu$ m pores (Corning, Wiesbaden,  
456 Germany) were used, which allowed soluble factors but not cells to pass through. A number  
457 of  $1 \times 10^5$  NSCLC cells were loaded onto the inserts and  $2 \times 10^5$  HDMECs were plated in the  
458 wells. After culture in EBM for 24 h, HDMECs were collected for RNA extraction.

459

#### 460 **Immunocytochemistry**

461 To check the cellular localization of p65, HDMECs were seeded on coverslips placed in a 6-  
462 well transwell plate and NCI-H460 cells were loaded onto the inserts. After culture in EBM  
463 for 4 h, HDMECs were fixed in 3.7% paraformaldehyde for 30 min, permeabilized with 0.5%  
464 Triton X-100 for 10 min and blocked with 2% bovine serum albumin (BSA) for 15 min.  
465 Afterwards, the cells were incubated with a primary antibody against p65 (1:25; R&D  
466 systems, Wiesbaden, Germany) for 1 h followed by the incubation with a Cy3-conjugated  
467 secondary antibody (1:250; Abcam, Cambridge, UK) for another 1 h. Cell nuclei were stained  
468 with Hoechst 33342 (Sigma-Aldrich, Taufkirchen, Germany). The percentage of p65-positive  
469 nuclei was quantified in 8 regions of interest (ROIs) of each coverslip at 40 $\times$  magnification  
470 with a BX-60 microscope (Olympus, Hamburg, Germany).

471

472 **Cell transfection**

473 To investigate the function of miR-22 in HDMECs, the cells were transfected with miR-22m  
474 (Qiagen, Hilden, Germany) or miR-22i (Qiagen) for 48 h to up- or down-regulate intracellular  
475 miR-22, respectively. Transfection reagent HiPerFect (Qiagen) was used according to the  
476 manufacturer's protocol. Cells transfected with NCm (Qiagen) or NCi (Qiagen) served as  
477 controls.

478

479 **WST-1 assay**

480 To assess cell viability, WST-1 assays (Roche Diagnostics, Mannheim, Germany) were  
481 performed according to the manufacturer's instructions. Briefly,  $4 \times 10^3$  HDMECs were seeded  
482 in 96-well plates and incubated for the indicated time periods. Then, 10  $\mu$ L WST-1 reagent  
483 was added into each well. After 30 min of incubation, the absorbance of each well was  
484 measured at 450 nm with 620 nm as reference by a microplate reader (PHOMo; anthos  
485 Mikrosysteme GmbH, Krefeld, Germany). The control group was assigned a value of 100%.

486

487 **Flow cytometry**

488 To analyze the purity of isolated HDMECs, the cells were incubated with a fluorescein  
489 isothiocyanate (FITC)-conjugated mouse anti-human CD31 antibody (1:50; BD Pharmingen,  
490 San Diego, CA, USA) for 30 min at room temperature followed by 3 washes with phosphate  
491 buffered saline (PBS). At least 10,000 events were acquired using a FACScan flow cytometer  
492 (BD Biosciences, Heidelberg, Germany) and analyzed with CellQuest Pro software (BD  
493 Biosciences).

494 The function of miR-22 in cell cycle regulation was also detected by flow cytometry as  
495 previously described (31). Briefly, transfected HDMECs were reseeded and incubated for 24  
496 h. The cells were then collected and fixed followed by staining with propidium iodide (PI)

497 and digestion with RNase A (Sigma-Aldrich). Subsequently, the cell cycle distribution was  
498 assessed by the FACScan flow cytometer and the DNA histograms of 10,000 cells were  
499 analyzed with the BD CellQuest Pro software.

500

### 501 **Cell migration assay**

502 To evaluate EC motility, two different migration assays were performed. For the scratch  
503 wound healing assay, HDMECs were seeded in 35-mm culture dishes. After reaching  
504 confluence, the cell monolayer was scratched with a 10- $\mu$ L pipette tip to generate scratch  
505 wounds and then rinsed with PBS to remove non-adherent cells. Phase-contrast microscopy  
506 (BZ-8000; Keyence, Osaka, Japan) was used to observe the wounds immediately after  
507 scratching (0 h) as well as after 12 h or 24 h. The wound area was measured and expressed as  
508 a percentage of corresponding NCm or NCi controls.

509 The transwell migration assay was performed as previously described (32). Briefly,  
510  $2.5 \times 10^5$  transfected HDMECs in 500  $\mu$ L EBM were seeded into an insert of 24-transwell  
511 plates with 8  $\mu$ m pores (Corning) and 750  $\mu$ L EBM supplemented with 1% FCS was added to  
512 the lower well. Cells were allowed to migrate for 5 h and thereafter stained with Dade Diff-  
513 Quick (Dade Diagnostika GmbH, Munich, Germany). Cell migration was quantified by  
514 counting the number of migrated cells in 20 ROIs at 20 $\times$  magnification using a BZ-8000  
515 microscope (Keyence) and expressed as a percentage of corresponding NCm or NCi controls.

516

### 517 **Tube formation assay**

518 To assess the tube forming activity of ECs,  $1.5 \times 10^4$  transfected HDMECs were added into  
519 each well of a 96-well plate pre-coated with 50  $\mu$ L Matrigel (~10 mg/mL; Corning). After  
520 incubation for 18 h, the formation of tubular structures was observed under phase-contrast  
521 microscopy (BZ-8000; Keyence). Tube formation was quantified by analyzing the number of

522 meshes (i.e. areas completely surrounded by endothelial tubes) with the ImageJ software  
523 (U.S. National Institutes of Health, Bethesda, Maryland, USA) and expressed as a percentage  
524 of corresponding NCm or NCi controls.

525

### 526 **Aortic ring assay**

527 To investigate the function of miR-22 in aortic sprouting, aortic rings processed from male  
528 BALB/c mice (8 weeks old) were transfected for 18 h with 50 nM miR-22m, 1  $\mu$ M miR-22i  
529 or scrambled NCm and NCi, and then embedded in Matrigel (~10 mg/mL; Corning) in a 96-  
530 well plate. After Matrigel polymerization, DMEM supplemented with 10% FCS was added  
531 into each well and sprouts from the aortic wall were allowed to develop for 6 days followed  
532 by observation with phase-contrast microscopy (BZ-8000; Keyence). Aortic sprouting was  
533 quantified by measuring the area of the outer aortic vessel sprouting and expressed as a  
534 percentage of corresponding NCm or NCi controls.

535

### 536 **Animal models**

537 All animal experiments were approved by the local governmental animal protection  
538 committee (permit number: 22/2014) and were conducted in accordance with the German  
539 legislation on protection of animals and the NIH Guidelines for the Care and Use of  
540 Laboratory Animals (NIH Publication #85-23 Rev. 1985).

541 To investigate the *in vivo* function of miR-22 in angiogenesis, a Matrigel plug assay was  
542 performed as previously described (17). Briefly, transfected HDMECs in EBM ( $1 \times 10^7$   
543 cells/mL) were mixed with the same volume of growth factor-reduced Matrigel (~20 mg/mL;  
544 Corning) and then supplemented with 1  $\mu$ g/mL VEGF (R&D Systems), 1  $\mu$ g/mL bFGF (R&D  
545 Systems) and 50 IU/mL heparin (B. Braun, Melsungen, Germany). Then, 300  $\mu$ L Matrigel  
546 admixed with HDMECs was subcutaneously injected into 8-10-week-old CD1 nude mice

547 (~25 g). The Matrigel plugs were collected for immunohistochemical analyses 7 days after  
548 implantation.

549 The function of endothelial miR-22 in tumor angiogenesis and growth was evaluated in  
550 a flank tumor model. For this purpose,  $1.5 \times 10^5$  NCI-H460 cells in combination with  $1.5 \times 10^6$   
551 NCm- or miR-22m-transfected HDMECs were suspended in 50  $\mu$ L EGM-MV and injected  
552 subcutaneously into the flanks of 8-week-old NOD-SCID (NOD. CB17/AlHnRj-Prkdc<sup>scid</sup>)  
553 mice (Janvier Labs, Le Genest-St-Isle, France). Two perpendicular diameters of the  
554 developing tumors were repetitively measured on day 0, 3, 7, 10 and 14 by means of a caliper.  
555 The tumor volumes were calculated using the formula  $V = 1/2 (L \times W^2)$ , where L was the  
556 longer and W was the shorter diameter (33). The tumor development was also assessed using  
557 a combined ultrasound and photoacoustic imaging system (Vevo LAZR) with a LZ550  
558 scanhead (40 MHz center frequency) (FUJIFILM VisualSonics Inc, Toronto, Canada) on day  
559 10 and 14 after implantation. The ultrasound images of tumors were analyzed by means of a  
560 three-dimensional reconstruction using VisualSonics software (Vevo LAB 1.7.2.). At the end  
561 of the experiment, i.e. on day 14, the tumors were carefully excised, weighed and further  
562 processed for immunohistochemical analyses.

563

## 564 **Immunohistochemistry**

565 Formalin-fixed specimens of Matrigel plugs and tumors were embedded in paraffin and 2- $\mu$ m  
566 sections were cut. To detect the neovascularization of the plugs and tumors, the sections were  
567 stained with a rabbit anti-human CD31 antibody (1:100; Abcam) or a rabbit anti-mouse CD31  
568 antibody (1:100; Abcam), followed by a goat-anti-rabbit Alexa Fluor 555-labeled secondary  
569 antibody (1:100; Life Technologies, Eugene, OR, USA) or a goat-anti-rat Alexa Fluor 488-  
570 labeled secondary antibody (1:100; Life Technologies). Cell nuclei were stained with Hoechst  
571 33342 (Sigma-Aldrich). The sections were subsequently examined using a fluorescence

572 microscope (BX60; Olympus). Microvessel density was quantified by counting the numbers  
573 of CD31-positive microvessels in 10 ROIs of each section at 20× magnification. To evaluate  
574 the proliferation and apoptosis of tumor cells, sections were stained with a monoclonal rabbit  
575 antibody against Ki67 (1:400; Cell Signaling Technology, Frankfurt, Germany) or a  
576 polyclonal rabbit antibody against cleaved casp-3 (1:100; New England Biolabs, Frankfurt,  
577 Germany), followed by a biotinylated goat anti-rabbit secondary antibody (Abcam) and  
578 streptavidin-peroxidase conjugate (ready-to-use; Abcam). The staining was completed by  
579 incubation with 3-amino-9-ethylcarbazole substrate (Abcam) before the sections were  
580 counterstained with Mayers hemalaun solution (HX948000; Merck, Darmstadt, Germany).  
581 The percentages of Ki67-positive proliferating and cleaved casp-3-positive apoptotic tumor  
582 cells were quantified in 12 ROIs of each section at 40× magnification with a BX-60  
583 microscope (Olympus).

584

#### 585 **Quantitative real-time polymerase chain reaction (PCR)**

586 Total RNA was extracted using RNeasy FFPE Kit (Qiagen), RNeasy Mini kit (Qiagen) or  
587 miRNeasy Mini kit (Qiagen) following the manufacturer's instructions. Then, the extracted  
588 RNA was processed for the reverse transcription reaction by utilizing QuantiTect Reverse  
589 Transcription Kit (Qiagen) or miScript II RT Kit (Qiagen). Noteworthy, after reverse  
590 transcription, cDNA of dissected ECs by LCM was further amplified using miScript PreAMP  
591 PCR Kit (Qiagen). Quantitative real-time PCR was performed and analyzed in a MiniOpticon  
592 Real-Time PCR System (BioRad, Munich, Germany) using QuantiTect SYBR green PCR Kit  
593 (Qiagen) or miScript SYBR Green PCR Kit. The relative expression levels of genes and  
594 miRNAs were calculated using the  $2^{-\Delta\Delta Ct}$  method with GAPDH and U6 as endogenous  
595 control, respectively. Gene-specific primer sequences are listed in Supplementary file 2. To  
596 analyze mature miRNA expression, miScript primer assays for Hs\_miR-22\_1 and Hs\_RNU6-



597 2\_11 from Qiagen were used.

598

### 599 **Western blot analysis**

600 As previously described (34), whole cell lysates were separated on 8% sodium dodecyl sulfate  
601 (SDS) polyacrylamide gels and transferred to polyvinylidene difluoride (PVDF) membranes  
602 (BioRad). The membranes were blocked and incubated overnight at 4 °C with a mouse  
603 monoclonal anti-FGFR1 antibody (1:100; Cell Signaling Technology), a rabbit polyclonal  
604 anti-p-AKT antibody (1:500; Cell Signaling Technology), a rabbit monoclonal anti-AKT  
605 antibody (1:500; Cell Signaling Technology), a rabbit monoclonal anti-p-mTOR (1:500; Cell  
606 Signaling Technology), a rabbit monoclonal anti-mTOR (1:500; Cell Signaling Technology)  
607 or a mouse monoclonal anti- $\beta$ -actin antibody (1:2,000; Sigma-Aldrich). This was followed by  
608 the corresponding horseradish peroxidase (HRP)-conjugated secondary antibodies (1:3,000;  
609 GE Healthcare, Freiburg, Germany). An electrochemiluminescence assay (GE Healthcare)  
610 was then performed and signals were acquired using a ChemoCam Imager (Intas, Göttingen,  
611 Germany). The intensities of protein bands were analyzed using the ImageJ software (U.S.  
612 National Institutes of Health).

613

### 614 **Luciferase assay**

615 For target validation, a control luciferase reporter plasmid (CmiT000001-MT06;  
616 GeneCopoeia, Rockville, USA) or *FGFR1*-3'UTR target plasmid (HmiT005432-MT06;  
617 GeneCopoeia) was co-transfected with 50 nM NCm or miR-22m into 293T cells using  
618 Lipofectamine 2000 (Invitrogen). After 48 h of incubation, Renilla and Firefly luciferase  
619 activities were measured by the Dual-Luciferase Reporter Assay Kit 2.0 (GeneCopoeia) using  
620 a Tecan Infinite 200 Pro microplate reader (Tecan, Crailsheim, Germany). Relative luciferase

621 activity was quantified by normalizing the Firefly luciferase signal to that of Renilla luciferase  
622 and expressed as a percentage of NCm controls.

623

## 624 **Statistics**

625 Statistical comparisons between two groups were made by the paired Student's t-test (for the  
626 analysis of patient samples) or the unpaired Student's t-test using GraphPad Prism 9.  
627 Statistical comparisons between multiple groups were made by one-way ANOVA followed  
628 by the Tukey's multiple comparisons test using GraphPad Prism 9. All data were expressed as  
629 means  $\pm$  SEM. A value of  $P < 0.05$  was considered significant.

630

631 **Acknowledgments:** We are grateful for the excellent technical assistance of Janine Becker,  
632 Christina Max and Ruth Nickels (all from the Institute for Clinical and Experimental Surgery,  
633 Saarland University). This work was supported by a research grant to Y.G. from the Medical  
634 Faculty of Saarland University (HOMFORexzellent 2015).

635

636 **Competing interests:** The authors declare no competing interests.

637

## 638 **References**

- 639 1. Fontanini G, Lucchi M, Vignati S, Mussi A, Ciardiello F, De Laurentiis M, De Placido  
640 S, Basolo F, Angeletti CA, Bevilacqua G. Angiogenesis as a prognostic indicator of survival  
641 in non-small-cell lung carcinoma: a prospective study. Journal of the National Cancer  
642 Institute. 1997;89(12):881-6. doi: <https://doi.org/10.1093/jnci/89.12.881>.
- 643 2. Bielenberg DR, Zetter BR. The Contribution of Angiogenesis to the Process of  
644 Metastasis. Cancer J. 2015;21(4):267-73. doi:  
645 <https://doi.org/10.1097/PPO.000000000000138>.

- 646 3. Rajabi M, Mousa SA. The Role of Angiogenesis in Cancer Treatment. *Biomedicines*.  
647 2017;5(2). doi: <https://doi.org/10.3390/biomedicines5020034>.
- 648 4. Hoeben A, Landuyt B, Highley MS, Wildiers H, Van Oosterom AT, De Bruijn EA.  
649 Vascular endothelial growth factor and angiogenesis. *Pharmacol Rev*. 2004;56(4):549-80. doi:  
650 <https://doi.org/10.1124/pr.56.4.3>.
- 651 5. Potente M, Ghaeni L, Baldessari D, Mostoslavsky R, Rossig L, Dequiedt F, Haendeler  
652 J, Mione M, Dejana E, Alt FW, Zeiher AM, Dimmeler S. SIRT1 controls endothelial  
653 angiogenic functions during vascular growth. *Genes Dev*. 2007;21(20):2644-58. doi:  
654 <https://doi.org/10.1101/gad.435107>.
- 655 6. Vasko R, Xavier S, Chen J, Lin CH, Ratliff B, Rabadi M, Maizel J, Tanokuchi R,  
656 Zhang F, Cao J, Goligorsky MS. Endothelial sirtuin 1 deficiency perpetrates nephrosclerosis  
657 through downregulation of matrix metalloproteinase-14: relevance to fibrosis of vascular  
658 senescence. *Journal of the American Society of Nephrology : JASN*. 2014;25(2):276-91. doi:  
659 <https://doi.org/10.1681/ASN.2013010069>.
- 660 7. Pillai VB, Sundaresan NR, Gupta MP. Regulation of Akt signaling by sirtuins: its  
661 implication in cardiac hypertrophy and aging. *Circulation research*. 2014;114(2):368-78. doi:  
662 <https://doi.org/10.1161/CIRCRESAHA.113.300536>.
- 663 8. Wang RH, Kim HS, Xiao C, Xu X, Gavrilova O, Deng CX. Hepatic Sirt1 deficiency  
664 in mice impairs mTorc2/Akt signaling and results in hyperglycemia, oxidative damage, and  
665 insulin resistance. *The Journal of clinical investigation*. 2011;121(11):4477-90. doi:  
666 <https://doi.org/10.1172/JCI46243>.
- 667 9. Sayed D, Abdellatif M. MicroRNAs in development and disease. *Physiological*  
668 *reviews*. 2011;91(3):827-87. doi: <https://doi.org/10.1152/physrev.00006.2010>.
- 669 10. Huang SC, Wang M, Wu WB, Wang R, Cui J, Li W, Li ZL, Li W, Wang SM. Mir-22-  
670 3p Inhibits Arterial Smooth Muscle Cell Proliferation and Migration and Neointimal

- 671 Hyperplasia by Targeting HMGB1 in Arteriosclerosis Obliterans. Cellular physiology and  
672 biochemistry : international journal of experimental cellular physiology, biochemistry, and  
673 pharmacology. 2017;42(6):2492-506. doi: <https://doi.org/10.1159/000480212>.
- 674 11. Xiong J. Emerging roles of microRNA-22 in human disease and normal physiology.  
675 Current molecular medicine. 2012;12(3):247-58. doi:  
676 <https://doi.org/10.2174/156652412799218886>.
- 677 12. Heusschen R, van Gink M, Griffioen AW, Thijssen VL. MicroRNAs in the tumor  
678 endothelium: novel controls on the angioregulatory switchboard. Biochim Biophys Acta.  
679 2010;1805(1):87-96. doi: <https://doi.org/10.1016/j.bbcan.2009.09.005>.
- 680 13. Pahl HL. Activators and target genes of Rel/NF-kappaB transcription factors.  
681 Oncogene. 1999;18(49):6853-66. doi: <https://doi.org/10.1038/sj.onc.1203239>.
- 682 14. Markopoulos GS, Roupakia E, Tokamani M, Alabasi G, Sandaltzopoulos R, Marcu  
683 KB, Kolettas E. Roles of NF-kappaB Signaling in the Regulation of miRNAs Impacting on  
684 Inflammation in Cancer. Biomedicines. 2018;6(2). doi:  
685 <https://doi.org/10.3390/biomedicines6020040>.
- 686 15. Hu Y, Liu HX, Jena PK, Sheng L, Ali MR, Wan YY. miR-22 inhibition reduces  
687 hepatic steatosis via FGF21 and FGFR1 induction. JHEP Rep. 2020;2(2):100093. doi:  
688 <https://doi.org/10.1016/j.jhepr.2020.100093>.
- 689 16. Presta M, Dell'Era P, Mitola S, Moroni E, Ronca R, Rusnati M. Fibroblast growth  
690 factor/fibroblast growth factor receptor system in angiogenesis. Cytokine & growth factor  
691 reviews. 2005;16(2):159-78. doi: <https://doi.org/10.1016/j.cytogfr.2005.01.004>.
- 692 17. Gu Y, Becker V, Zhao Y, Menger MD, Laschke MW. miR-370 inhibits the  
693 angiogenic activity of endothelial cells by targeting smoothed (SMO) and bone  
694 morphogenetic protein (BMP)-2. FASEB J. 2019;33(6):7213-24. doi:  
695 <https://doi.org/10.1096/fj.201802085RR>.

- 696 18. Zheng Y, Xu Z. MicroRNA-22 induces endothelial progenitor cell senescence by  
697 targeting AKT3. *Cellular physiology and biochemistry : international journal of experimental*  
698 *cellular physiology, biochemistry, and pharmacology.* 2014;34(5):1547-55. doi:  
699 <https://doi.org/10.1159/000366358>.
- 700 19. Gu W, Zhan H, Zhou XY, Yao L, Yan M, Chen A, Liu J, Ren X, Zhang X, Liu JX,  
701 Liu G. MicroRNA-22 regulates inflammation and angiogenesis via targeting VE-cadherin.  
702 *FEBS letters.* 2017;591(3):513-26. doi: <https://doi.org/10.1002/1873-3468.12565>.
- 703 20. Siegel RL, Miller KD, Jemal A. Cancer statistics, 2020. *CA Cancer J Clin.*  
704 2020;70(1):7-30. doi: <https://doi.org/10.3322/caac.21590>.
- 705 21. Zappa C, Mousa SA. Non-small cell lung cancer: current treatment and future  
706 advances. *Transl Lung Cancer Res.* 2016;5(3):288-300. doi:  
707 <https://doi.org/10.21037/tlcr.2016.06.07>.
- 708 22. Wurdinger T, Tannous BA, Saydam O, Skog J, Grau S, Soutschek J, Weissleder R,  
709 Breakefield XO, Krichevsky AM. miR-296 regulates growth factor receptor overexpression in  
710 angiogenic endothelial cells. *Cancer Cell.* 2008;14(5):382-93. doi:  
711 <https://doi.org/10.1016/j.ccr.2008.10.005>.
- 712 23. Lopes-Bastos BM, Jiang WG, Cai J. Tumour-Endothelial Cell Communications:  
713 Important and Indispensable Mediators of Tumour Angiogenesis. *Anticancer research.*  
714 2016;36(3):1119-26.
- 715 24. Johansson A, Hamzah J, Payne CJ, Ganss R. Tumor-targeted TNFalpha stabilizes  
716 tumor vessels and enhances active immunotherapy. *Proceedings of the National Academy of*  
717 *Sciences of the United States of America.* 2012;109(20):7841-6. doi:  
718 <https://doi.org/10.1073/pnas.1118296109>.

- 719 25. Fajardo LF, Kwan HH, Kowalski J, Prionas SD, Allison AC. Dual role of tumor  
720 necrosis factor-alpha in angiogenesis. *The American journal of pathology*. 1992;140(3):539-  
721 44.
- 722 26. Sainson RC, Johnston DA, Chu HC, Holderfield MT, Nakatsu MN, Crampton SP,  
723 Davis J, Conn E, Hughes CC. TNF primes endothelial cells for angiogenic sprouting by  
724 inducing a tip cell phenotype. *Blood*. 2008;111(10):4997-5007. doi:  
725 <https://doi.org/10.1182/blood-2007-08-108597>.
- 726 27. Voronov E, Carmi Y, Apte RN. The role IL-1 in tumor-mediated angiogenesis.  
727 *Frontiers in physiology*. 2014;5:114. doi: <https://doi.org/10.3389/fphys.2014.00114>.
- 728 28. Wang B, Li D, Filkowski J, Rodriguez-Juarez R, Storzynsky Q, Malach M,  
729 Carpenter E, Kovalchuk O. A dual role of miR-22 modulated by RelA/p53 in resensitizing  
730 fulvestrant-resistant breast cancer cells to fulvestrant by targeting FOXP1 and HDAC4 and  
731 constitutive acetylation of p53 at Lys382. *Oncogenesis*. 2018;7(7):54. doi:  
732 <https://doi.org/10.1038/s41389-018-0063-5>.
- 733 29. Segal M, Slack FJ. Challenges identifying efficacious miRNA therapeutics for cancer.  
734 *Expert Opin Drug Discov*. 2020;15(9):987-92. doi:  
735 <https://doi.org/10.1080/17460441.2020.1765770>.
- 736 30. O'Brien J, Hayder H, Zayed Y, Peng C. Overview of MicroRNA Biogenesis,  
737 Mechanisms of Actions, and Circulation. *Front Endocrinol (Lausanne)*. 2018;9:402. doi:  
738 <https://doi.org/10.3389/fendo.2018.00402>.
- 739 31. Gu Y, Ampofo E, Menger MD, Laschke MW. miR-191 suppresses angiogenesis by  
740 activation of NF-kappaB signaling. *FASEB J*. 2017;31(8):3321-33. doi:  
741 <https://doi.org/10.1096/fj.201601263R>.

- 742 32. Gu Y, Scheuer C, Feng D, Menger MD, Laschke MW. Inhibition of angiogenesis: a  
743 novel antitumor mechanism of the herbal compound arctigenin. *Anticancer Drugs*.  
744 2013;24(8):781-91. doi: <https://doi.org/10.1097/CAD.0b013e328362fb84>.
- 745 33. Tomayko MM, Reynolds CP. Determination of subcutaneous tumor size in athymic  
746 (nude) mice. *Cancer chemotherapy and pharmacology*. 1989;24(3):148-54. doi:  
747 <https://doi.org/10.1007/BF00300234>.
- 748 34. Jiang X, Hu C, Arnovitz S, Bugno J, Yu M, Zuo Z, Chen P, Huang H, Ulrich B,  
749 Gurbuxani S, Weng H, Strong J, Wang Y, Li Y, Salat J, Li S, Elkahloun AG, Yang Y, Neilly  
750 MB, Larson RA, Le Beau MM, Herold T, Bohlander SK, Liu PP, Zhang J, Li Z, He C, Jin J,  
751 Hong S, Chen J. miR-22 has a potent anti-tumour role with therapeutic potential in acute  
752 myeloid leukaemia. *Nature communications*. 2016;7:11452. doi:  
753 <https://doi.org/10.1038/ncomms11452>.

754

## 755 **Figure Legends**

756 **Figure 1. NSCLC cells down-regulate miR-22 expression in ECs.** **A:** Expression level of  
757 miR-22 (normalized by U6) in ECs dissected from non-tumor (NEC) or tumor tissues (TEC)  
758 of NSCLC patients by means of LCM, as assessed by real-time PCR (n = 12). **B:** Expression  
759 level of miR-22 (in fold of H23) in NCI-H23 cells, NCI-H460 cells, NHDFs, hPC-PLs,  
760 HDMECs and HUVECs, as assessed by real-time PCR (n = 3). **C:** Expression level of miR-22  
761 (in % of HDMEC) in isolated HDMECs that were cultured alone (HDMEC) or co-cultured in  
762 direct contact with NCI-H460 cells (HDMEC (H460)) or NCI-H23 cells (HDMEC (H23)), as  
763 assessed by real-time PCR (n = 3). **D:** Expression level of miR-22 (in % of HDMEC) in  
764 HDMECs that were cultured alone (HDMEC) or co-cultured with NCI-H460 cells (HDMEC  
765 (H460)) or NCI-H23 cells (HDMEC (H23)) without contact in a transwell plate, as assessed  
766 by real-time PCR (n = 3). **E:** Expression level of miR-22 (in % of Con) in HDMECs that were

767 exposed for 24 h to vehicle (Con), 50 ng/mL VEGF, 50 ng/mL bFGF, 100 ng/mL EGF, 10  
768 ng/mL TNF- $\alpha$ , 2 ng/mL IL-1 $\beta$  or 100 ng/mL IL-6 in EBM, as assessed by real-time PCR (n =  
769 3). **F**: Expression level of miR-22 (in % of Con) in HDMECs that were treated for 24 h with  
770 vehicle (Con) or 1  $\mu$ M Bay 11-7082 (Bay), as assessed by real-time PCR (n = 3). **G**: Cellular  
771 localization of NF- $\kappa$ B in HDMECs that were cultured alone or co-cultured with NCI-H460  
772 cells without contact in a transwell plate and stained for p65 (red). Cell nuclei were labeled  
773 with Hoechst 33342 (blue). The nuclear translocation of p65 is indicated by arrows. Scale bar:  
774 60  $\mu$ m. **H**: p65-positive nuclei (in % of the total number of nuclei) of HDMECs that were  
775 cultured alone (HDMEC) or co-cultured with NCI-H460 cells (HDMEC (H460)) without  
776 contact in a transwell plate (n = 3). **I**: Expression level of miR-22 (in % of HDMEC) in  
777 HDMECs that were cultured alone (HDMEC) or co-cultured with NCI-H460 cells (HDMEC  
778 (H460)) without contact in a transwell plate in the absence or presence of Bay, as assessed by  
779 real-time PCR (n = 3). Means  $\pm$  SEM. \*P < 0.05, \*\*P < 0.01, \*\*\*P < 0.001 vs. NEC, H23,  
780 HDMEC or Con; ###P < 0.001 vs. HDMEC or HDMEC (H460).

781  
782 **Figure 2. MiR-22 inhibits HDMEC viability, migration and tube formation.** **A, B**:  
783 Viability (in % of NCm or NCi) of HDMECs transfected with miR-22m (**A**), miR-22i (**B**) or  
784 corresponding scrambled NCm (**A**) and NCi (**B**), as assessed by WST-1 assay (n = 4-5). After  
785 transfection, the cells were reseeded in 96-well plates and cultured for 24 h, 48 h or 72 h. **C**,  
786 **D**: Phase-contrast microscopic images of HDMECs at 0 h, 12 h or 24 h after scratching. The  
787 cells were transfected with miR-22m (**C**), miR-22i (**D**) or corresponding scrambled NCm (**C**)  
788 and NCi (**D**). White lines indicate scratched wound area. Scale bars: 190  $\mu$ m. **E, F**: Wound  
789 area (in % of 0 h) created by scratching the monolayer of HDMECs transfected with miR-  
790 22m (**E**), miR-22i (**F**) or corresponding scrambled NCm (**E**) and NCi (**F**), as assessed by  
791 scratch wound healing assay (n = 6-8). **G, I**: Phase-contrast microscopic images of tube-



792 forming HDMECs. The cells were transfected with miR-22m (**G**), miR-22i (**I**) or  
793 corresponding scrambled NCm (**G**) and NCi (**I**). Scale bars: 550  $\mu$ m. **H, J**: Tube formation (in  
794 % of NCm or NCi) of HDMECs transfected with miR-22m (**H**), miR-22i (**J**) or corresponding  
795 scrambled NCm (**H**) and NCi (**J**), as assessed by tube formation assay (n = 5). Means  $\pm$  SEM.  
796 \*P < 0.05, \*\*P < 0.01, \*\*\*P < 0.001 vs. NCm or NCi.

797

798 **Figure 3. MiR-22 suppresses angiogenesis ex vivo and in vivo.** **A, C**: Phase-contrast  
799 microscopic images of mouse aortic rings, which were transfected with miR-22m (**A**), miR-  
800 22i (**C**) or corresponding scrambled NCm (**A**) and NCi (**C**) overnight and then cultured in  
801 Matrigel for 6 days. Scale bars: 400  $\mu$ m. **B, D**: Sprouting (in % of NCm or NCi) of aortic  
802 rings that were transfected with miR-22m (**B**), miR-22i (**D**) or corresponding scrambled NCm  
803 (**B**) and NCi (**D**), as assessed by computer-assisted image analysis (n = 6-8). **E, G**:  
804 Immunohistochemical detection of human CD31-positive microvessels (red) in Matrigel plugs  
805 containing HDMECs transfected with miR-22m (**E**), miR-22i (**G**) or corresponding scrambled  
806 NCm (**E**) and NCi (**G**). Sections were additionally stained with Hoechst 33342 to identify cell  
807 nuclei (blue). Scale bars: 40  $\mu$ m. **F, H**: Microvessel density (in % of NCm or NCi) of Matrigel  
808 plugs containing HDMECs transfected with miR-22m (**F**), miR-22i (**H**) or corresponding  
809 scrambled NCm (**F**) and NCi (**H**), as assessed by immunohistochemistry (n = 7-8). Means  $\pm$   
810 SEM. \*P<0.05, \*\*P < 0.01, \*\*\*P < 0.001 vs. NCm or NCi.

811

812 **Figure 4. Endothelial miR-22 inhibits tumor angiogenesis and growth.** **A**: Volume (mm<sup>3</sup>)  
813 of developing NCI-H460 flank tumors containing NCm- or miR-22m-transfected HDMECs,  
814 as assessed by means of a digital caliper on the day of tumor induction (day 0) as well as on  
815 day 3, 7, 10, 12 and 14 (n = 8). **B**: Final weight (mg) of tumors containing NCm- or miR-  
816 22m-transfected HDMECs on day 14 (n = 8). **C**: High-resolution ultrasound imaging of

817 tumors containing NCm- or miR-22m-transfected HDMECs on day 10 and 14 after  
818 implantation. The borders of tumors are marked by white dashed lines. Scale bar: 1.8 mm. **D**:  
819 Volume (mm<sup>3</sup>) of tumors containing NCm- or miR-22m-transfected HDMECs, as assessed by  
820 high-resolution ultrasound imaging on day 10 and 14 (n = 5-8). **E**: Immunohistochemical  
821 detection of newly formed human (red) and mouse (green) microvessels in tumors containing  
822 NCm- or miR-22m-transfected HDMECs on day 14 (n = 8). Sections were stained with  
823 Hoechst 33342 to identify cell nuclei (blue). Scale bar: 60 μm. **F**: Density (mm<sup>-2</sup>) of human  
824 and mouse microvessels in tumors containing NCm- or miR-22m-transfected HDMECs on  
825 day 14 (n = 8). **G, I**: Immunohistochemical detection of human Ki67- (**G**) or cleaved casp-3-  
826 positive (**I**) tumor cells within NCI-H460 xenografts containing NCm- or miR-22m-  
827 transfected HDMECs. Scale bars: 25 μm. **H, J**: Ki67-positive (**H**) or cleaved casp-3-positive  
828 cells (**J**) (in % of the total number of nuclei) within NCI-H460 xenografts containing NCm- or  
829 miR-22m-transfected HDMECs (n = 8). Means ± SEM. \*P<0.05, \*\*P < 0.01, \*\*\*P < 0.001  
830 vs. NCm.

831  
832 **Figure 5. MiR-22 targets *SIRT1* and *FGFR1* in ECs.** **A**: mRNA levels (in % of NCm) of  
833 putative and validated human target genes of miR-22 in NCm- or miR-22m-transfected  
834 HDMECs, as assessed by real-time PCR (n = 3). **B**: Western blot of SIRT1, FGFR1 and β-  
835 actin expression in HDMECs transfected with NCm or miR-22m. **C**: Expression level (in %  
836 of NCm) of SIRT1/β-actin and FGFR1/β-actin, as assessed by Western blot (n = 3). **D**:  
837 Luciferase activity (in % of NCm) in 293T cells co-transfected with NCm or miR-22m and a  
838 reporter plasmid carrying mutant or wild-type *FGFR1*-3'UTR, as assessed by luciferase assay  
839 (n = 4). **E**: Western blot of p-AKT, AKT, p-mTOR, mTOR and β-actin expression in  
840 HDMECs transfected with NCm or miR-22m. **F, G**: Expression levels (in % of NCm) of p-

841 AKT/AKT (**F**) and p-mTOR/mTOR (**G**), as assessed by Western blot (n = 3). Means ± SEM.

842 \*P < 0.05, \*\*P < 0.01, \*\*\*P < 0.001 vs. NCm.

843

844 **Figure 6. MiR-22 inhibits angiogenesis through targeting *SIRT1* and *FGFR1*. A, B:**

845 Viability (in % of 0 μM or 0 nM) of HDMECs that were exposed for 72 h to serial dilutions

846 of EX-527 (**A**) and PD173074 (**B**), as assessed by WST-1 assay (n = 3). **C:** Viability (in % of

847 NCi) of HDMECs that were transfected with NCi or miR-22i and then treated with 10 μM

848 EX-527 (**EX**) or 50 nM PD173074 (**PD**) for 72 h, as assessed by WST-1 assay (n = 4). **D:**

849 Wound area (in % of 0 h) created by scratching the monolayer of HDMECs that were

850 transfected with NCi or miR-22i and then treated with 10 μM EX or 50 nM PD for 12 h, as

851 assessed by scratch wound healing assay (n = 6-7). **E:** Tube formation (in % of NCi) of

852 HDMECs that were transfected with NCi or miR-22i and then treated with 10 μM EX or 50

853 nM PD for 18 h, as assessed by tube formation assay (n = 5). **F:** Viability (in % of NCi) of

854 HDMECs that were transfected with NCi or miR-22i and then treated with 5 μM MK-2206

855 (**MK**) for 72 h, as assessed by WST-1 assay (n = 4). **G:** Wound area (in % of 0 h) created by

856 scratching the monolayer of HDMECs that were transfected with NCi or miR-22i and then

857 treated with 5 μM MK for 12 h, as assessed by scratch wound healing assay (n = 6). **H:** Tube

858 formation (in % of NCi) of HDMECs that were transfected with NCi or miR-22i and then

859 treated with 5 μM MK for 18 h, as assessed by tube formation assay (n = 4). **I, J:** mRNA

860 levels of *SIRT1* (**I**) and *FGFR1* (**J**) (in % of Con) in HDMECs that were exposed for 72 h to

861 vehicle (Con), 10 ng/mL TNF-α, 2 ng/mL IL-1β or 1 μM Bay, as assessed by real-time PCR

862 (n = 3). **K, L:** mRNA level of *SIRT1* (**K**) or *FGFR1* (**L**) (in % of HDMEC) in HDMECs that

863 were cultured alone (HDMEC) or co-cultured with NCI-H460 cells (HDMEC (H460))

864 without contact in a transwell plate in the absence or presence of 1 μM Bay for 72 h, as

865 assessed by real-time PCR (n = 3). Means ± SEM. \*P < 0.05, \*\*P < 0.01, \*\*\*P < 0.001 vs. 0

866  $\mu\text{M}$  or 0 nM, NCi, Con or HDMEC;  $\#P < 0.05$ ,  $\#\#P < 0.01$ ,  $\#\#\#P < 0.001$  vs. miR-22i or  
867 HDMEC (460).

868

869 **Figure 7. NSCLC cells induce angiogenesis by down-regulating endothelial miR-22,**  
870 **which targets *SIRT1* and *FGFR1*.** The scheme summarizes the underlying mechanisms, as  
871 outlined in detail in the discussion section.

872

873 **Figure legends for figure supplement**

874 **Figure 2-figure supplement 1. Expression of miR-22 and its effect on EC viability. A, B:**  
875 Expression level of miR-22 (in fold of NCm or in % of NCi) in HDMECs transfected with  
876 miR-22m (A), miR-22i (B) or corresponding scrambled NCm (A) and NCi (B), as assessed by  
877 real-time PCR (n = 3). C: Viability (in % of NCm) of HDMECs transfected with miR-22m or  
878 NCm, as assessed by WST-1 assay (n = 4). After transfection, the cells were reseeded in 96-  
879 well plates and cultured for 0, 3, 6 or 10 days followed by WST-1 assay. Means  $\pm$  SEM.  
880  $\#\#\#P < 0.001$  vs. NCm or NCi.

881

882 **Figure 2-figure supplement 2. MiR-22 blocks HDMECs in the S phase. A:** Representative  
883 cell cycle analysis of HDMECs transfected with NCm or miR-22m, as assessed by flow  
884 cytometry. B: Number of NCm- or miR-22m-transfected HDMECs in the G0/G1, S and  
885 G2/M phase (in % of total cell number), as assessed by flow cytometry (n = 3). C: Number of  
886 NCm- or miR-22m-transfected HDMECs in the sub-G1 phase (in % of total cell number), as  
887 assessed by flow cytometry (n = 3). Means  $\pm$  SEM.  $*P < 0.05$  vs. NCm.

888

889 **Figure 2-figure supplement 3. MiR-22 suppresses HDMEC migration. A, C:** Light  
890 microscopic images of migrated HDMECs. The cells were transfected with miR-22m (**A**),  
891 miR-22i (**C**) or corresponding scrambled NCm (**A**) and NCi (**C**). Scale bars: 55  $\mu$ m. **B, D:**  
892 Migration (in % of NCm or NCi) of HDMECs transfected with miR-22m (**B**), miR-22i (**D**) or  
893 corresponding scrambled NCm (**B**) and NCi (**D**), as assessed by transwell migration assay (n  
894 = 3). Means  $\pm$  SEM. \*P < 0.05 vs. NCm or NCi.

895

**Figure 1**

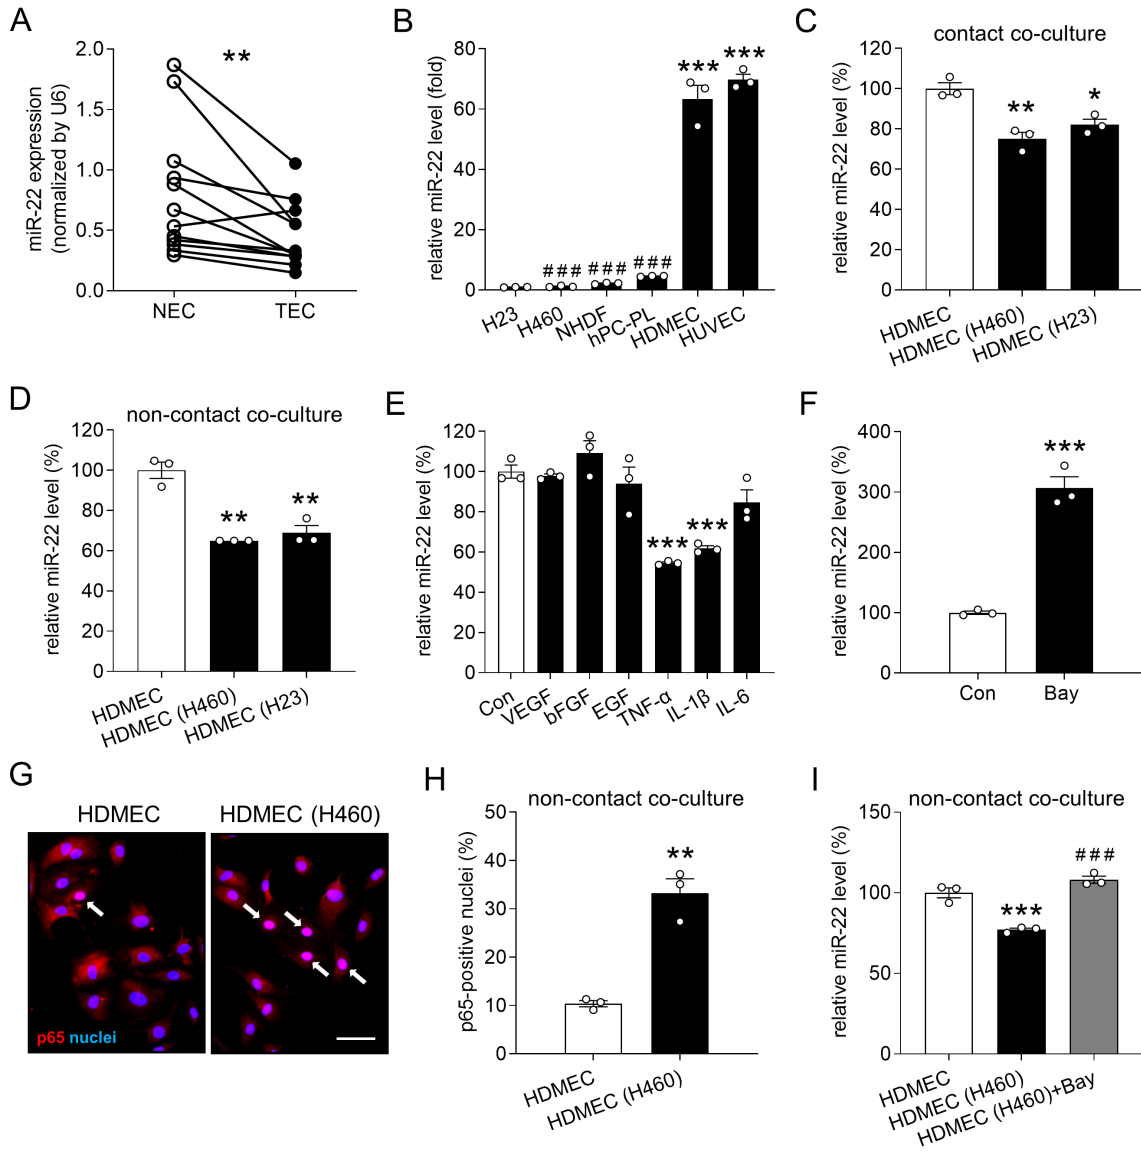

**Figure 2**

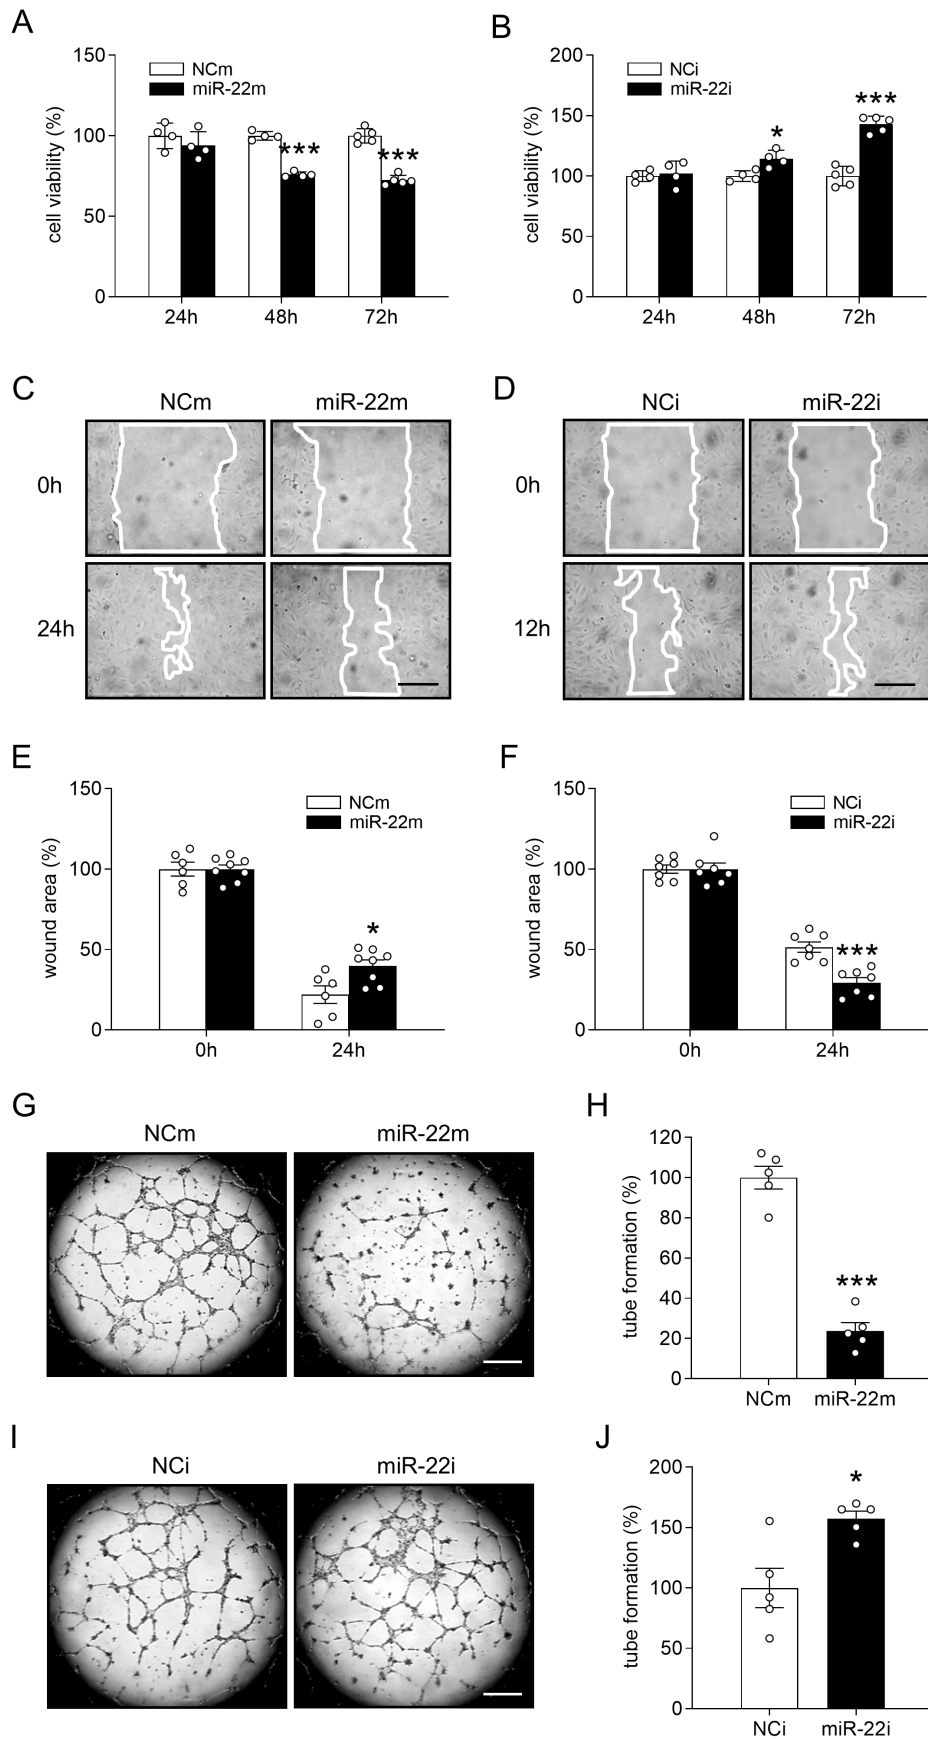

**Figure 3**

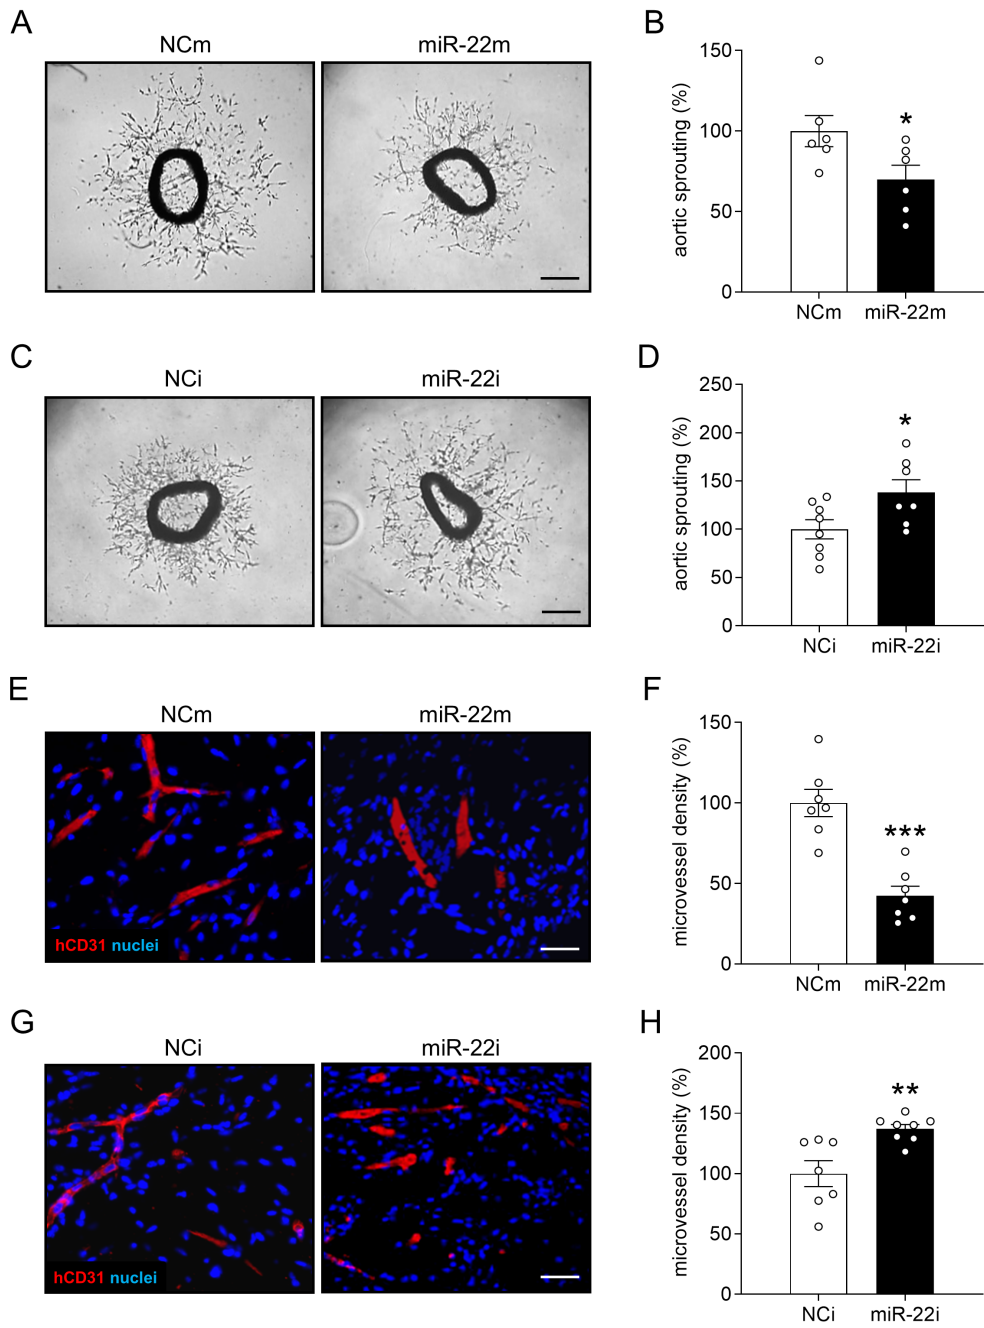



**Figure 4**

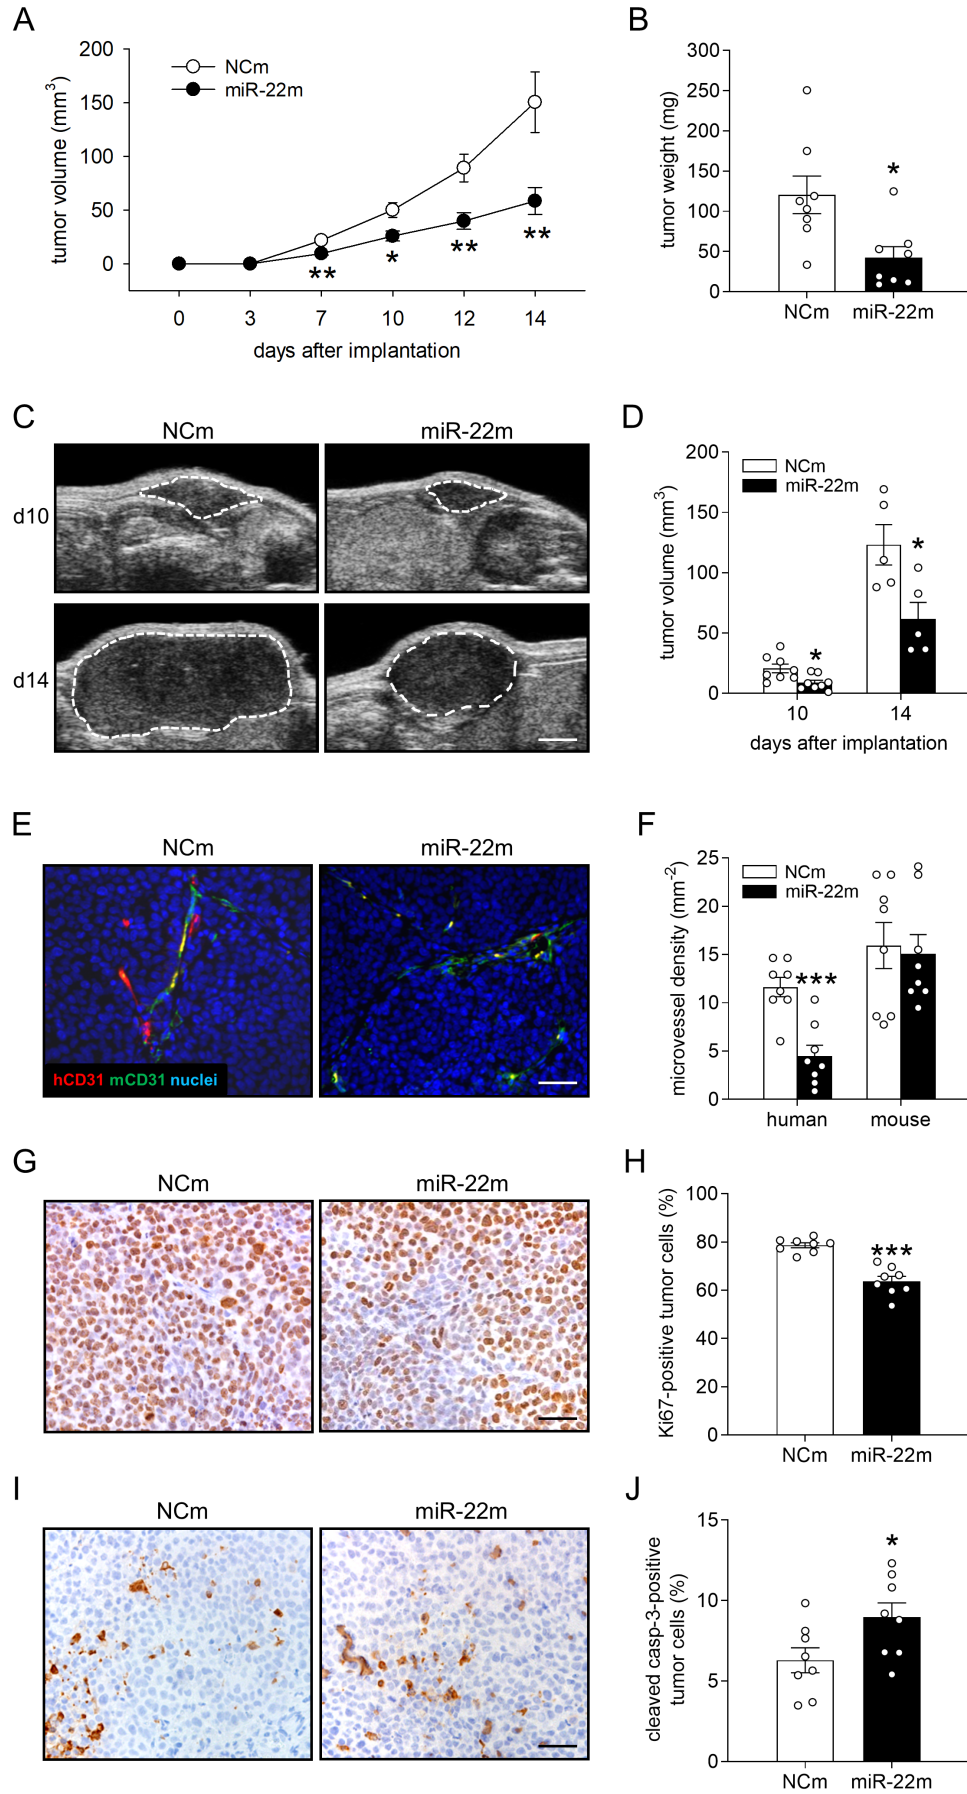

**Figure 5**

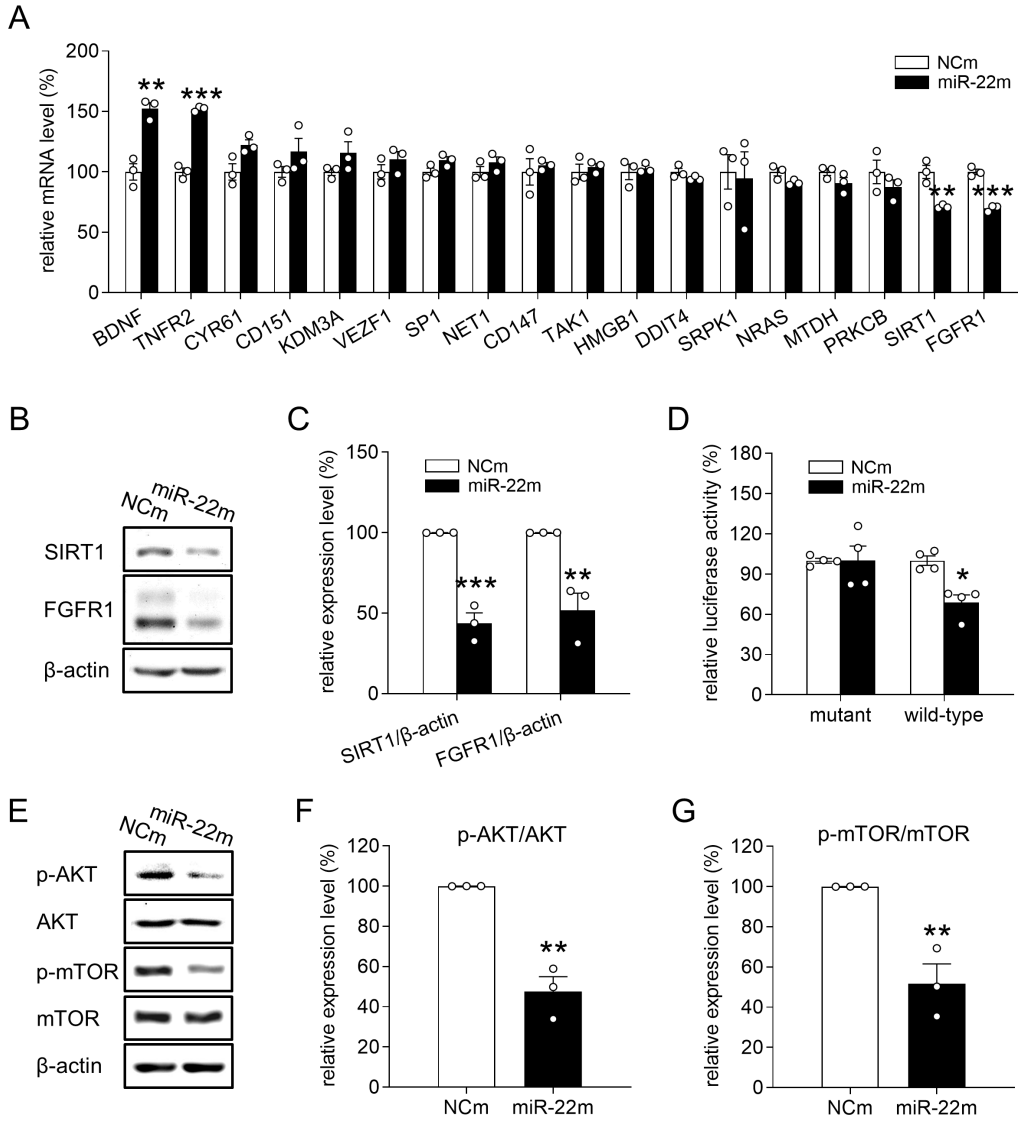

**Figure 6**

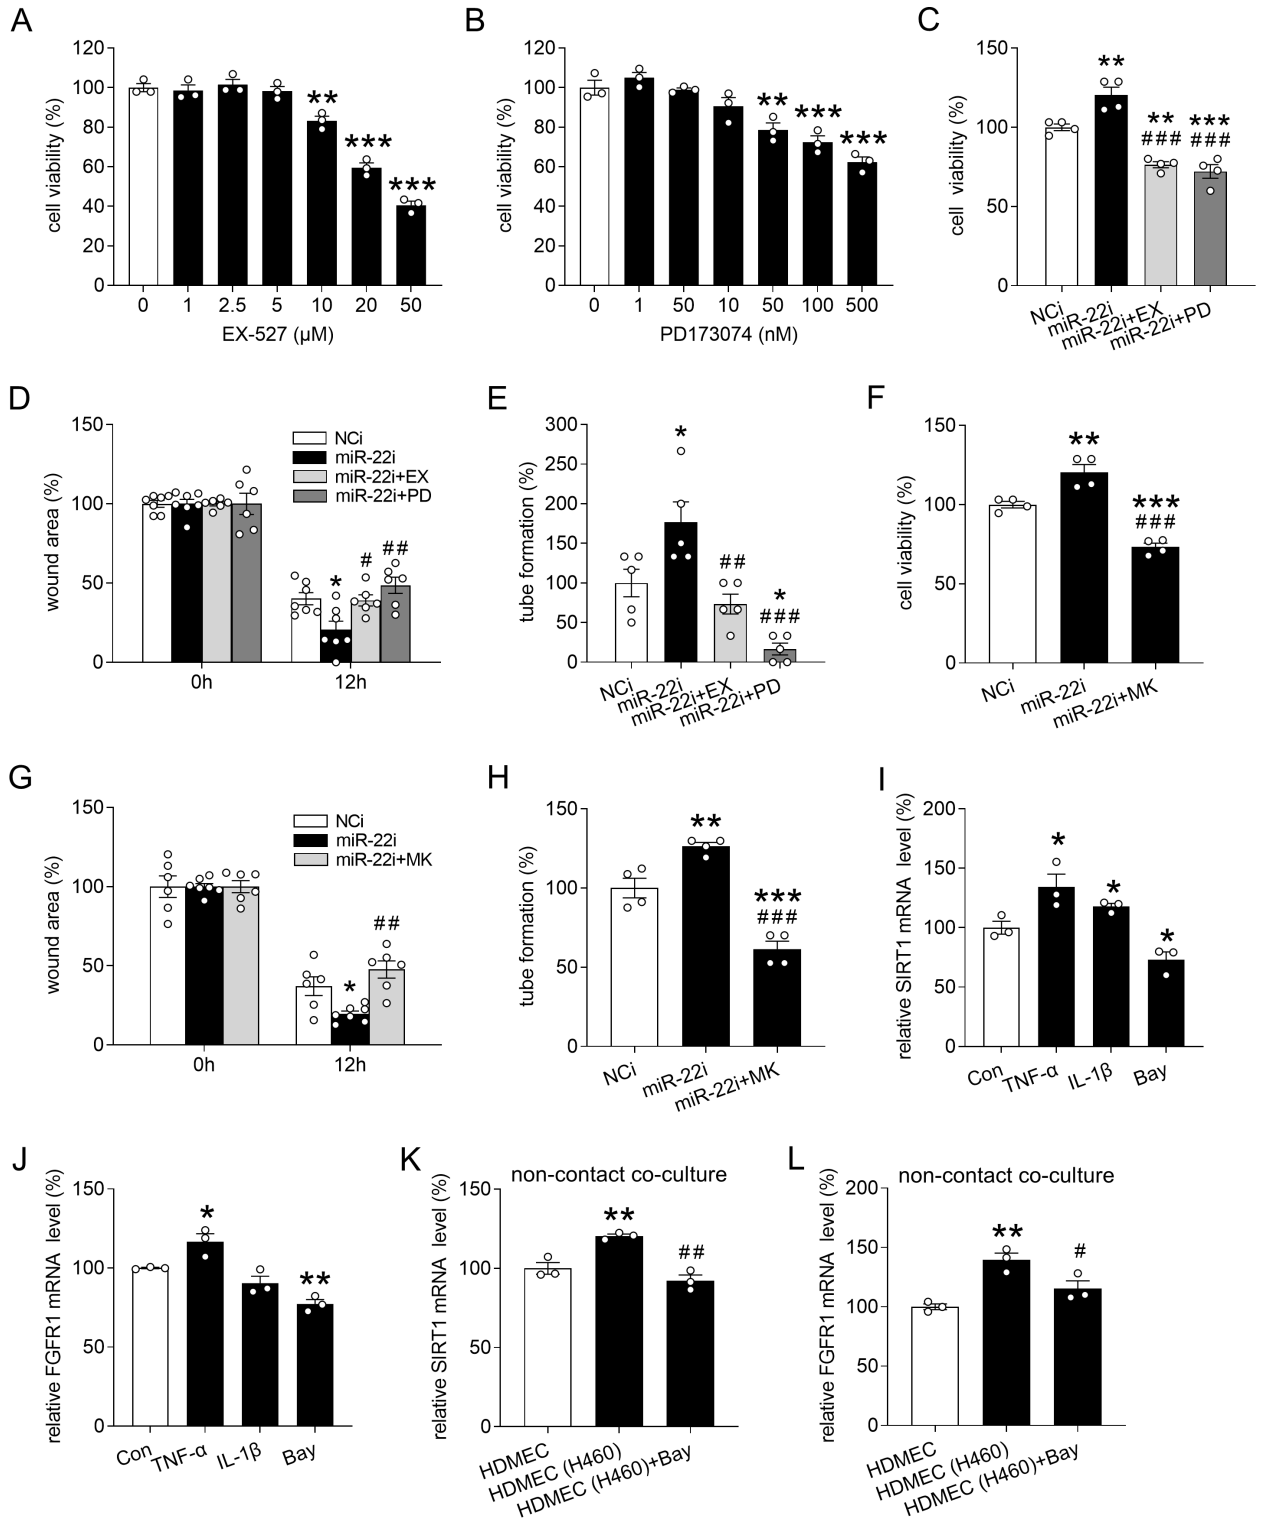

Figure 7

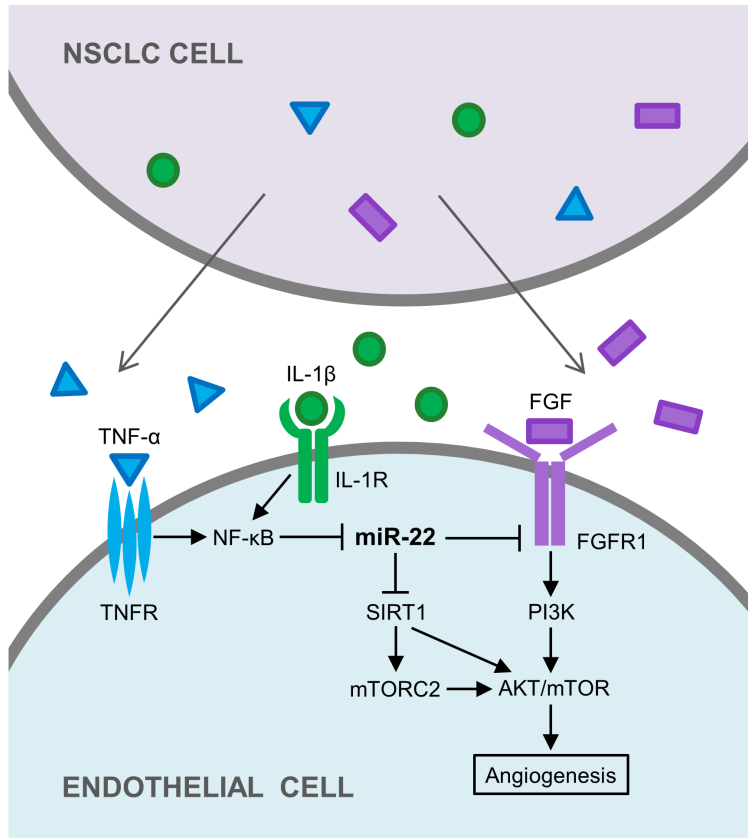

Figure 2-figure supplement 1

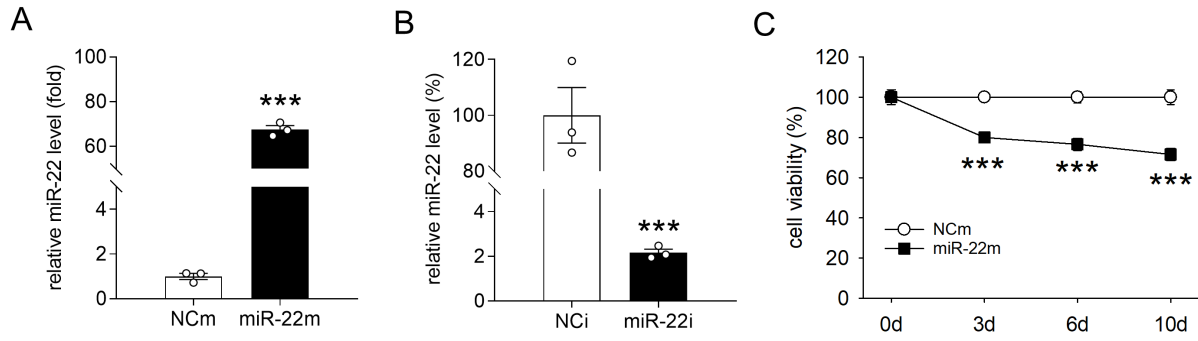

Figure 2-figure supplement 2

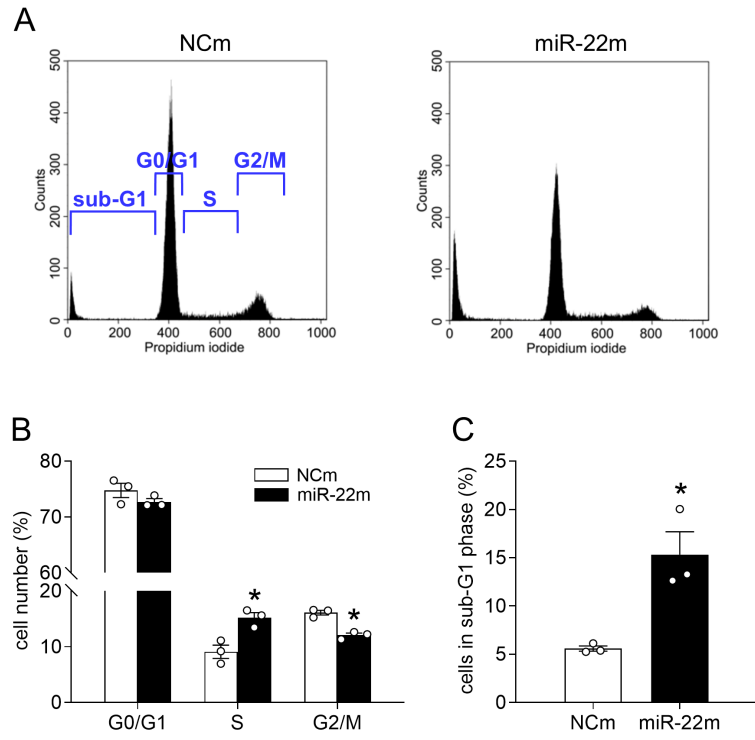

Figure 2-figure supplement 3

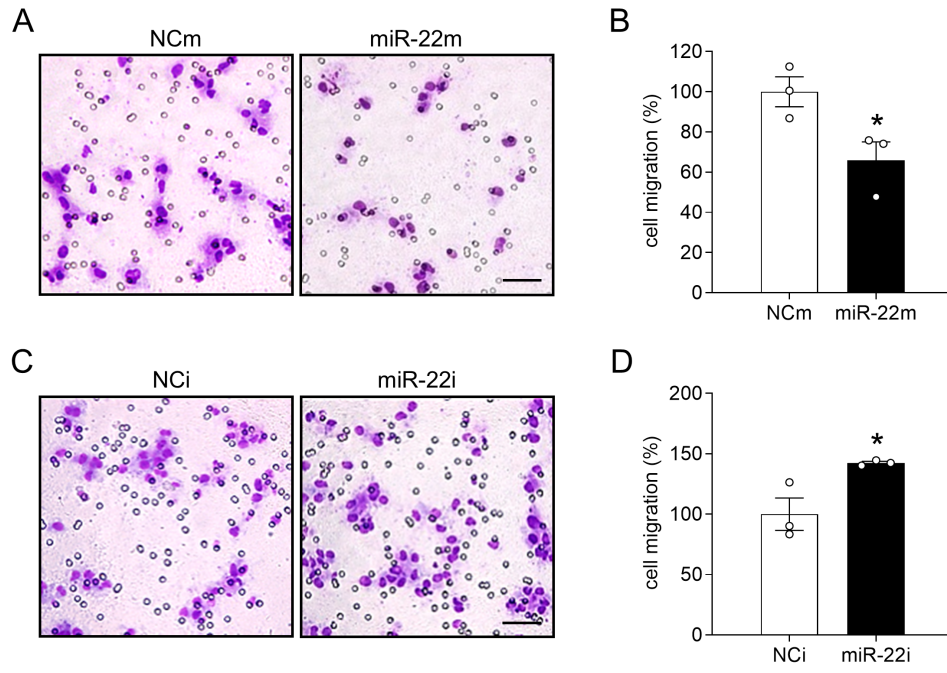

Source: https://www.biorxiv.org/content/10.1101/2021.04.04.438401v1.full.pdf
